# Supplementary material for: Light-induced O2-dependent aliphatic carbon–carbon (C–C) bond cleavage in bipyridine-ligated Co(ii) chlorodiketonate complexes
Source: Royal Society of Chemistry journal article supplement (doi:10.1039/d2dt03727k), 2023-01-01
Supplement: d2dt03727k1.pdf [file d2dt03727k1.pdf]

Light-induced O<sub>2</sub>-dependent aliphatic carbon-carbon (C-C) bond cleavage in bipyridine-ligated  
Co(II) chlorodiketonate complexes

Stephen N. Anderson<sup>†</sup>, Josiah G. D. Elsberg<sup>†</sup>, and Lisa M. Berreau<sup>\*,†</sup>

<sup>†</sup>Department of Chemistry and Biochemistry, Utah State University, Logan, Utah 84322-0300,  
United States

| Table of Contents                                                                                                       | Page |
|-------------------------------------------------------------------------------------------------------------------------|------|
| Table S1. Summary of X-ray data collection and refinement                                                               | S3   |
| Table S2. Selected bond distances (Å) for <b>8-10</b>                                                                   | S4   |
| Table S3. Selected bond angles (deg) for <b>8-10</b>                                                                    | S4   |
| Fig S1. FTIR spectrum of <b>8</b>                                                                                       | S5   |
| Fig S2. FTIR spectrum of <b>9</b>                                                                                       | S6   |
| Fig S3. FTIR spectrum of <b>10</b>                                                                                      | S7   |
| Fig S4. ESI-MS of <b>8</b>                                                                                              | S8   |
| Fig S5. ESI-MS of <b>9</b>                                                                                              | S9   |
| Fig S6. ESI-MS of <b>10</b>                                                                                             | S10  |
| Fig S7. <sup>1</sup> H NMR of <b>8</b> in CD <sub>3</sub> CN                                                            | S11  |
| Fig S8. <sup>1</sup> H NMR of <b>9</b> in CD <sub>3</sub> CN                                                            | S12  |
| Fig S9. <sup>1</sup> H NMR of <b>10</b> in CD <sub>3</sub> CN                                                           | S13  |
| Fig S10. <sup>1</sup> H NMR of <b>11</b> in CD <sub>3</sub> CN                                                          | S14  |
| Fig S11. UV-vis spectrum of <b>8</b> in CH <sub>3</sub> CN under N <sub>2</sub>                                         | S15  |
| Fig S12. UV-vis spectrum of <b>9</b> in CH <sub>3</sub> CN under N <sub>2</sub>                                         | S16  |
| Fig S13. UV-vis spectrum of <b>10</b> in CH <sub>3</sub> CN under N <sub>2</sub>                                        | S17  |
| Fig S14. <sup>1</sup> H NMR of <b>8</b> + hν under N <sub>2</sub> – organic recovery                                    | S18  |
| Fig S15. <sup>1</sup> H NMR of <b>9</b> + hν under N <sub>2</sub> – organic recovery                                    | S19  |
| Fig S16. <sup>1</sup> H NMR of <b>10</b> + hν under N <sub>2</sub> – organic recovery                                   | S20  |
| Fig S17. Absorption spectrum of <b>9</b> + hν + O <sub>2</sub>                                                          | S21  |
| Fig S18. Absorption spectrum of <b>10</b> + hν + O <sub>2</sub>                                                         | S22  |
| Fig S19. <sup>1</sup> H NMR studies of the UV-light induced O <sub>2</sub> reactivity of <b>8</b> in CD <sub>3</sub> CN | S23  |
| Fig S20. ESI-MS of an acetonitrile solution of <b>8</b> after illumination                                              | S24  |

|                                                                                                                                                         |     |
|---------------------------------------------------------------------------------------------------------------------------------------------------------|-----|
| Fig S21. ESI-MS of an acetonitrile solution of <b>9</b> after illumination                                                                              | S25 |
| Fig S22. ESI-MS of an acetonitrile solution of <b>10</b> after illumination                                                                             | S26 |
| Fig S23. ESI-MS of an acetonitrile solution of <b>8</b> illuminated at 350 nm<br>under $^{18}\text{O}_2$                                                | S27 |
| Fig S24. $^1\text{H}$ NMR of <b>12</b> in $\text{CD}_3\text{CN}$                                                                                        | S28 |
| Fig S25. ESI-MS of <b>12</b>                                                                                                                            | S29 |
| Fig S26. $^1\text{H}$ NMR of <b>12</b> + $h\nu$ + $\text{O}_2$                                                                                          | S30 |
| Fig S27. Absorption spectrum of <b>12</b> + $h\nu$ + $\text{O}_2$                                                                                       | S31 |
| Fig S28. $^1\text{H}$ NMR of <b>9</b> + $h\nu$ + $\text{O}_2$ – organic recovery                                                                        | S32 |
| Fig S29. $^1\text{H}$ NMR of <b>10</b> + $h\nu$ + $\text{O}_2$ – organic recovery                                                                       | S33 |
| Fig S30. $^1\text{H}$ NMR of <b>12</b> + $h\nu$ + $\text{O}_2$ – organic recovery                                                                       | S34 |
| Fig S31. Representation of the cationic portion of <b>13</b>                                                                                            | S35 |
| Table S4. Selected bond distances ( $\text{\AA}$ ) for <b>13</b>                                                                                        | S36 |
| Table S5. Selected bond angles (deg) for <b>13</b>                                                                                                      | S36 |
| Fig S32. $^1\text{H}$ NMR of isolated organic products from the reaction of <b>13</b><br>with trione and NaOCl with $\text{O}_2$ bubbling for 2 minutes | S37 |
| Fig S33. Solution generated upon bubbling of $\text{O}_2$ through a $\text{CH}_3\text{CN}$<br>solution of <b>13</b> for 8 h                             | S38 |
| Fig S34. Absorption spectrum of a $\text{CH}_3\text{CN}$ solution of <b>13</b> after<br>bubbling with $\text{O}_2$ for 8 h                              | S38 |
| Fig S35. $^1\text{H}$ NMR of <b>13</b> + 8 h $\text{O}_2$                                                                                               | S39 |
| Fig S36. $^1\text{H}$ NMR of <b>13</b> + 8 h $\text{O}_2$ – diamagnetic region                                                                          | S40 |
| Fig S37. $^1\text{H}$ NMR of isolated organic products from the reaction of <b>13</b><br>with trione and NaOCl with $\text{O}_2$ bubbling for 8 h       | S41 |
| Fig S38. $^1\text{H}$ NMR spectra in $\text{CD}_3\text{CN}$ of <b>13</b> + NaOCl + $\text{O}_2$ – organic recovery                                      | S42 |
| Fig S39. $^1\text{H}$ NMR spectra in $\text{CD}_3\text{CN}$ of <b>13</b> + NaOCl + $\text{O}_2$                                                         | S43 |

**Table S1.** Summary of X-ray data collection and refinement.<sup>a</sup>

|                                                            | <b>8 • O(CH<sub>2</sub>CH<sub>3</sub>)<sub>2</sub></b>                          | <b>9 • 0.5 CH<sub>3</sub>CN • 0.5 O(CH<sub>2</sub>CH<sub>3</sub>)<sub>2</sub></b>     | <b>10</b>                                                                       | <b>12</b>                                                                       |
|------------------------------------------------------------|---------------------------------------------------------------------------------|---------------------------------------------------------------------------------------|---------------------------------------------------------------------------------|---------------------------------------------------------------------------------|
| Empirical formula                                          | C <sub>39</sub> H <sub>36</sub> Cl <sub>2</sub> CoN <sub>4</sub> O <sub>7</sub> | C <sub>40</sub> H <sub>36.5</sub> Cl <sub>2</sub> CoN <sub>4.5</sub> O <sub>6.5</sub> | C <sub>37</sub> H <sub>30</sub> Cl <sub>2</sub> CoN <sub>4</sub> O <sub>8</sub> | C <sub>24</sub> H <sub>22</sub> Cl <sub>2</sub> CoN <sub>6</sub> O <sub>8</sub> |
| Formula weight                                             | 802.55                                                                          | 814.06                                                                                | 788.48                                                                          | 652.30                                                                          |
| Crystal system                                             | Triclinic                                                                       | Orthorhombic                                                                          | Monoclinic                                                                      | Triclinic                                                                       |
| Space group                                                | P-1                                                                             | Pna2 <sub>1</sub>                                                                     | P2 <sub>1</sub> /n                                                              | P-1                                                                             |
| <i>a</i> (Å)                                               | 11.3963(6)                                                                      | 21.4753(12)                                                                           | 13.8215(7)                                                                      | 10.0272(8)                                                                      |
| <i>b</i> (Å)                                               | 12.6001(7)                                                                      | 17.7824(9)                                                                            | 18.0740(10)                                                                     | 10.2270(6)                                                                      |
| <i>c</i> (Å)                                               | 14.2773(7)                                                                      | 19.6340(12)                                                                           | 14.7453(7)                                                                      | 15.4354(6)                                                                      |
| α (deg)                                                    | 73.724(2)                                                                       | 90                                                                                    | 90                                                                              | 83.304(4)                                                                       |
| β (deg)                                                    | 86.205(2)                                                                       | 90                                                                                    | 110.426(2)                                                                      | 83.219(4)                                                                       |
| γ (deg)                                                    | 69.356(2)                                                                       | 90                                                                                    | 90                                                                              | 61.217(7)                                                                       |
| <i>V</i> (Å <sup>3</sup> )                                 | 1840.40(17)                                                                     | 7497.9(7)                                                                             | 3451.9(3)                                                                       | 1372.19(17)                                                                     |
| <i>Z</i>                                                   | 2                                                                               | 8                                                                                     | 4                                                                               | 2                                                                               |
| ρ <sub>calc</sub> (g/cm <sup>3</sup> )                     | 1.448                                                                           | 1.442                                                                                 | 1.517                                                                           | 1.579                                                                           |
| Temp (K)                                                   | 100                                                                             | 100                                                                                   | 100                                                                             | 100                                                                             |
| Crystal size (mm <sup>-1</sup> )                           | 0.28 × 0.226 × 0.11                                                             | 0.24 × 0.21 × 0.20                                                                    | 0.26 × 0.25 × 0.02                                                              | 0.24 × 0.19 × 0.12                                                              |
| Diffractometer                                             | Bruker D8 Venture                                                               | Bruker D8 Venture                                                                     | Bruker D8 Venture                                                               | Rigaku XtaLAB Mini II Diffractometer                                            |
| Abs. coeff. (mm <sup>-1</sup> )                            | 0.668                                                                           | 0.656                                                                                 | 0.712                                                                           | 0.879                                                                           |
| 2θ (deg)                                                   | 54.298                                                                          | 55.162                                                                                | 55.1                                                                            | 60.234                                                                          |
| Reflections collected                                      | 87249                                                                           | 96371                                                                                 | 54870                                                                           | 25701                                                                           |
| Indep. Reflections                                         | 8151                                                                            | 17244                                                                                 | 7949                                                                            | 8973                                                                            |
| <i>R</i> 1 / <i>wR</i> 2 <sup>b</sup>                      | 0.0411 / 0.1019                                                                 | 0.0356 / 0.0837                                                                       | 0.0352 / 0.0736                                                                 | 0.0363 / 0.0885                                                                 |
| GOF ( <i>F</i> <sup>2</sup> )                              | 1.047                                                                           | 1.032                                                                                 | 1.027                                                                           | 1.042                                                                           |
| Δρ <sub>max</sub> / Δρ <sub>min</sub> (e Å <sup>-3</sup> ) | 1.0 / -0.7                                                                      | 0.61 / -0.26                                                                          | 0.58 / -0.41                                                                    | 0.47 / -0.49                                                                    |

<sup>a</sup> Radiation used: MoKα (λ = 0.71073 Å). <sup>b</sup>  $R1 = \sum ||F_o| - |F_c|| / \sum |F_o|$ ;  $wR2 = [\sum [w(F_o^2 - F_c^2)^2] / \sum (F_o^2)]^{1/2}$  where  $w = 1 / [\sigma^2(F_o^2) + (aP)^2 + bP]$ .

**Table S2.** Selected bond distances (Å) for **8-10**

|             | <b>8</b>   | <b>9A</b> | <b>9B</b> | <b>10</b>  |
|-------------|------------|-----------|-----------|------------|
| Co(1)-O(1)  | 2.0596(14) | 2.034(3)  | 2.024(3)  | 2.0577(13) |
| Co(1)-O(2)  | 2.0437(15) | 2.030(2)  | 2.027(2)  | 2.0286(13) |
| Co(1)-N(1)  | 2.1333(17) | 2.146(3)  | 2.134(3)  | 2.1544(16) |
| Co(1)-N(2)  | 2.1251(17) | 2.152(3)  | 2.139(3)  | 2.1040(15) |
| Co(1)-N(3)  | 2.1136(17) | 2.114(3)  | 2.110(3)  | 2.1307(16) |
| Co(1)-N(4)  | 2.1321(18) | 2.109(3)  | 2.106(3)  | 2.1269(16) |
| O(1)-C(22)  | 1.267(2)   | 1.260(4)  | 1.280(4)  | 1.272(2)   |
| O(2)-C(21)  | 1.265(3)   | 1.262(4)  | 1.262(4)  | 1.267(2)   |
| C(21)-C(23) | 1.404(3)   | 1.412(5)  | 1.420(5)  | 1.413(3)   |
| C(22)-C(23) | 1.414(3)   | 1.406(5)  | 1.411(5)  | 1.412(3)   |

**Table S3.** Selected bond angles (deg) for **8-10**

|                   | <b>8</b>   | <b>9A</b>  | <b>9B</b>  | <b>10</b>  |
|-------------------|------------|------------|------------|------------|
| O(1)-Co(1)-N(1)   | 171.12(6)  | 168.96(10) | 86.70(10)  | 162.39(6)  |
| O(1)-Co(1)-N(2)   | 96.60(6)   | 92.73(11)  | 170.22(11) | 93.02(6)   |
| O(1)-Co(1)-N(3)   | 92.08(6)   | 97.44(11)  | 94.03(12)  | 91.67(6)   |
| O(1)-Co(1)-N(4)   | 87.37(6)   | 89.61(11)  | 93.29(12)  | 94.73(5)   |
| O(2)-Co(1)-O(1)   | 86.02(6)   | 86.70(10)  | 92.88(11)  | 85.80(5)   |
| O(2)-Co(1)-N(1)   | 87.80(6)   | 89.36(10)  | 89.47(11)  | 81.29(6)   |
| O(2)-Co(1)-N(2)   | 89.04(6)   | 87.42(11)  | 89.19(11)  | 97.13(6)   |
| O(2)-Co(1)-N(3)   | 95.97(6)   | 93.09(11)  | 94.63(11)  | 90.26(6)   |
| O(2)-Co(1)-N(4)   | 170.14(6)  | 168.98(11) | 171.70(11) | 167.23(6)  |
| N(2)-Co(1)-N(1)   | 76.91(7)   | 76.79(12)  | 76.90(12)  | 76.85(6)   |
| N(2)-Co(1)-N(4)   | 98.99(7)   | 103.14(12) | 95.99(12)  | 95.58(6)   |
| N(3)-Co(1)-N(1)   | 94.90(7)   | 93.06(12)  | 92.19(11)  | 100.28(6)  |
| N(3)-Co(1)-N(2)   | 170.26(7)  | 169.83(13) | 171.93(12) | 171.51(6)  |
| N(3)-Co(1)-N(4)   | 76.96(7)   | 77.09(12)  | 77.11(12)  | 76.98(6)   |
| N(4)-Co(1)-N(1)   | 99.54(7)   | 96.06(11)  | 99.11(12)  | 100.51(6)  |
| C(22)-O(1)-Co(1)  | 128.50(13) | 127.9(2)   | 129.4(2)   | 128.22(12) |
| C(21)-O(2)Co(1)   | 127.21(14) | 129.3(2)   | 130.7(2)   | 131.73(12) |
| O(1)-C(22)-C(23)  | 123.45(19) | 124.5(3)   | 123.8(3)   | 124.29(17) |
| O(2)-C(21)-C(23)  | 124.3(2)   | 123.2(3)   | 122.9(3)   | 121.59(16) |
| O(1)-C(22)-C(25)  | 115.39(18) | 114.3(3)   | 114.1(3)   | 115.70(15) |
| O(2)-C(21)-C(24)  | 114.95(19) | 114.1(3)   | 114.6(3)   | 114.49(16) |
| C(21)-C(23)-C(22) | 124.82(19) | 124.7(3)   | 124.8(3)   | 125.15(17) |
| C(23)-C(21)-C(24) | 120.75(19) | 122.6(3)   | 122.5(3)   | 123.86(16) |
| C(23)-C(22)-C(25) | 121.14(19) | 121.1(3)   | 122.1(3)   | 119.96(16) |

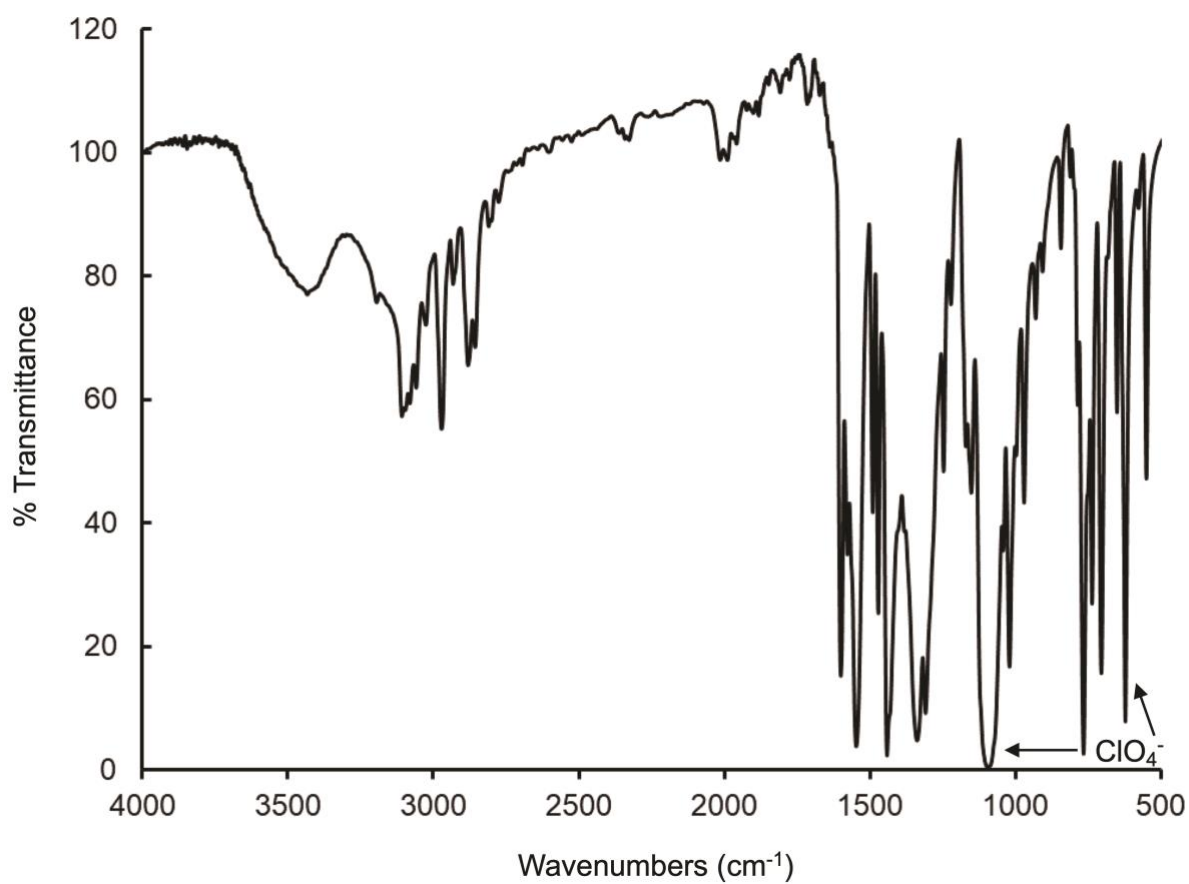

**Fig S1.** FTIR spectrum for **8** collected as a KBr pellet.

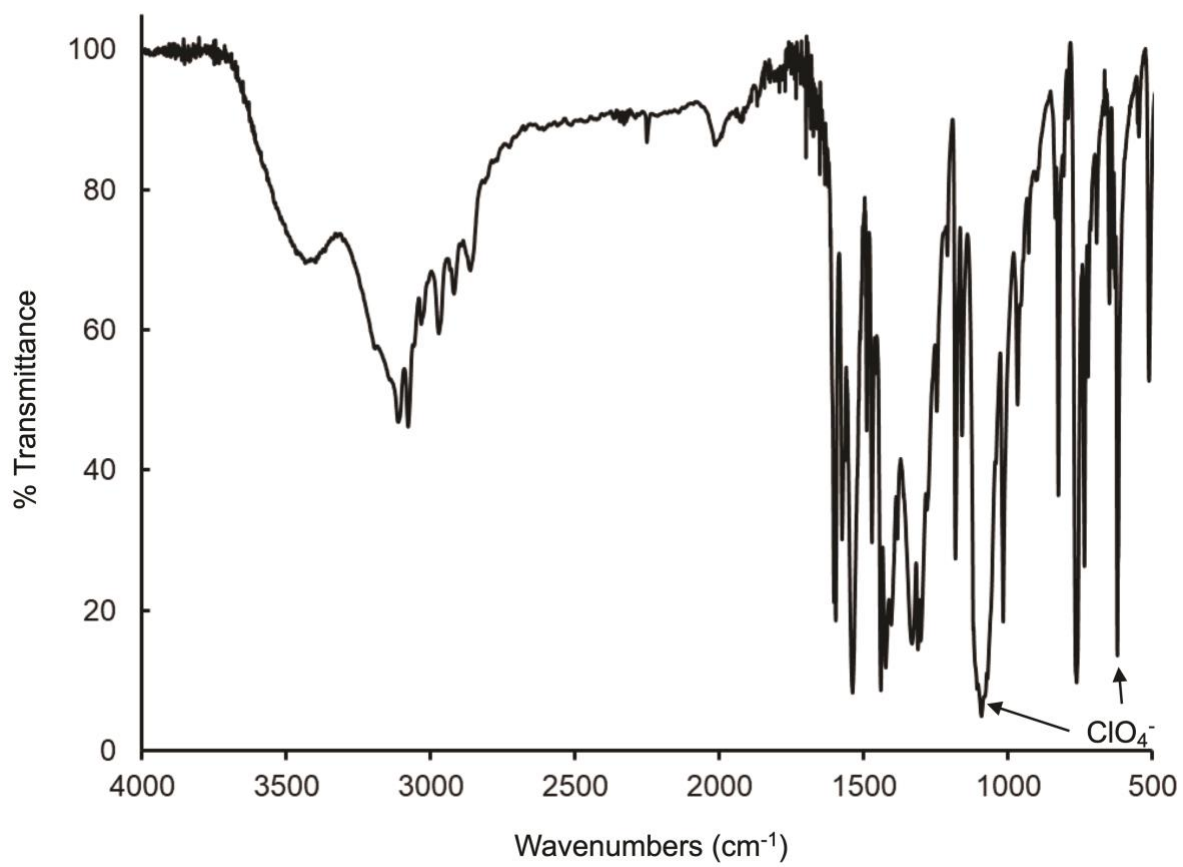

**Fig S2.** FTIR spectrum for **9** collected as a KBr pellet.

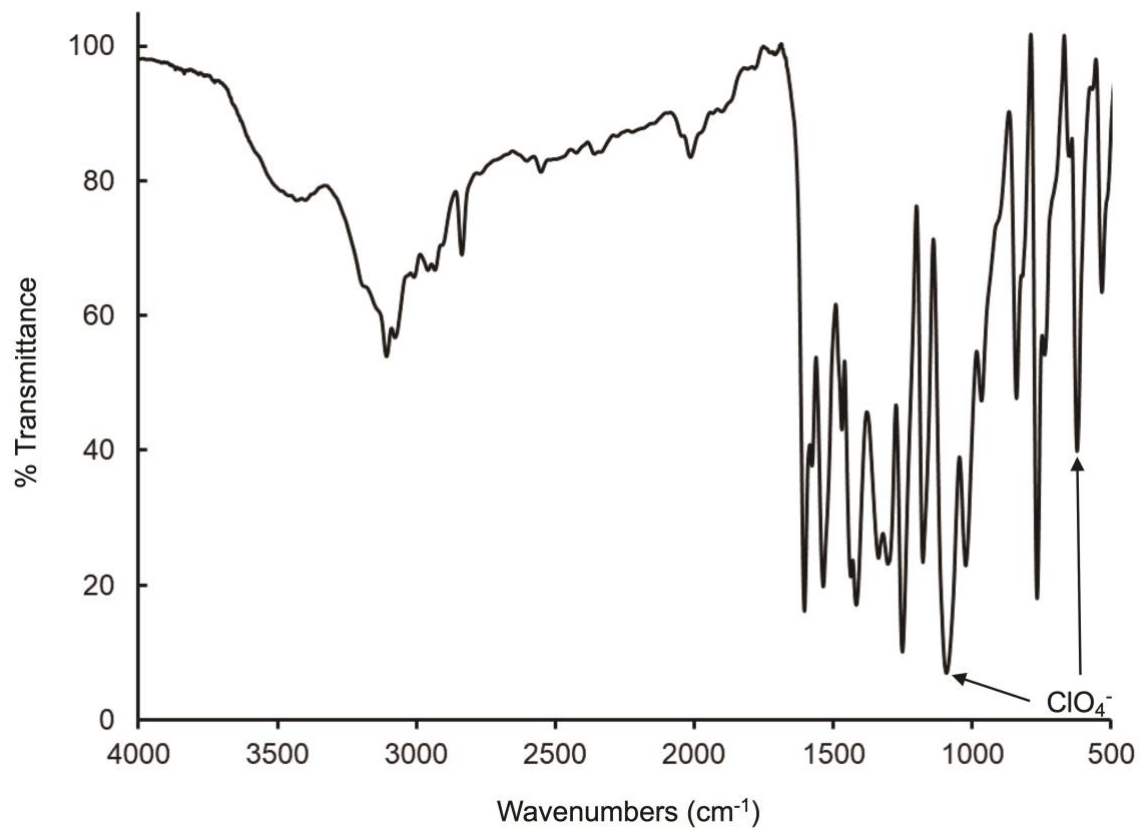

**Fig S3.** IR spectrum for **10** collected as a KBr pellet.

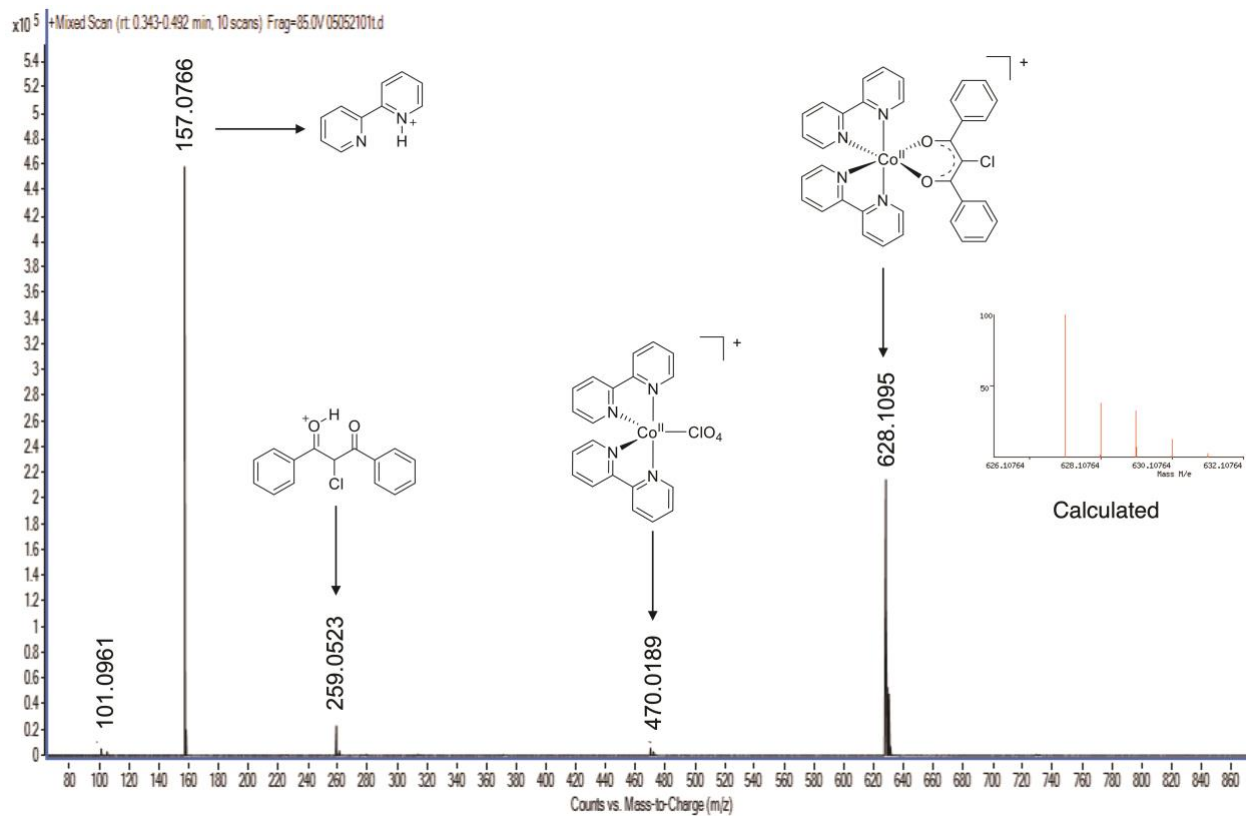

**Fig S4.** ESI-MS of **8** in CH<sub>3</sub>CN.



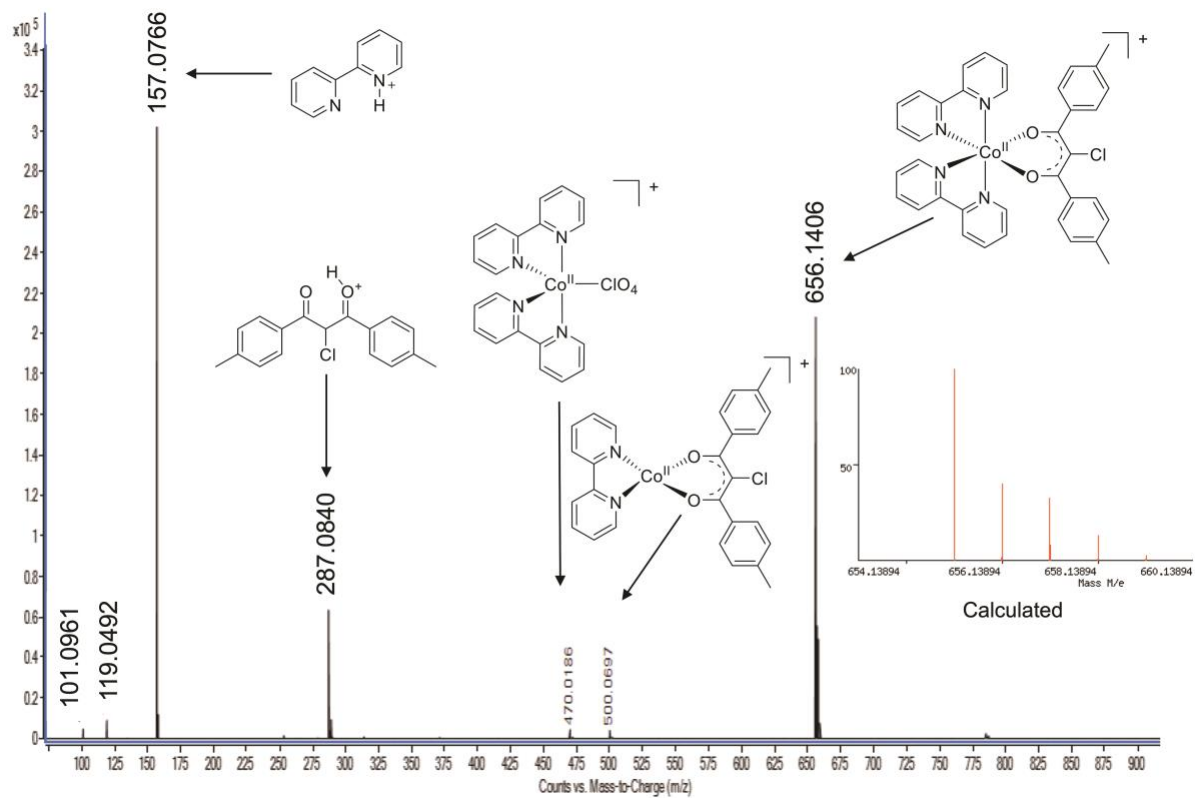

**Fig S5.** ESI-MS of **9** in  $\text{CH}_3\text{CN}$ .

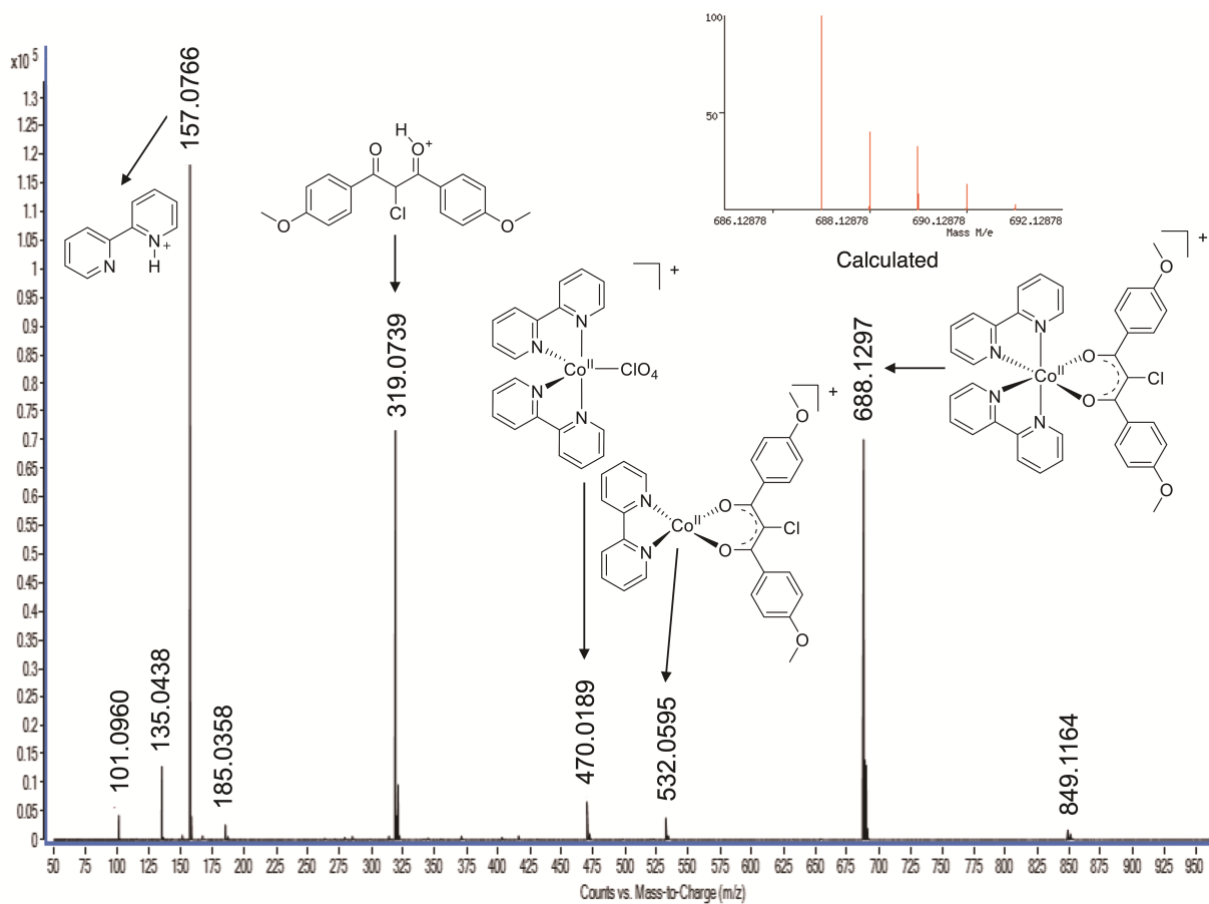

**Fig S6.** ESI-MS of **10** in  $\text{CH}_3\text{CN}$ .

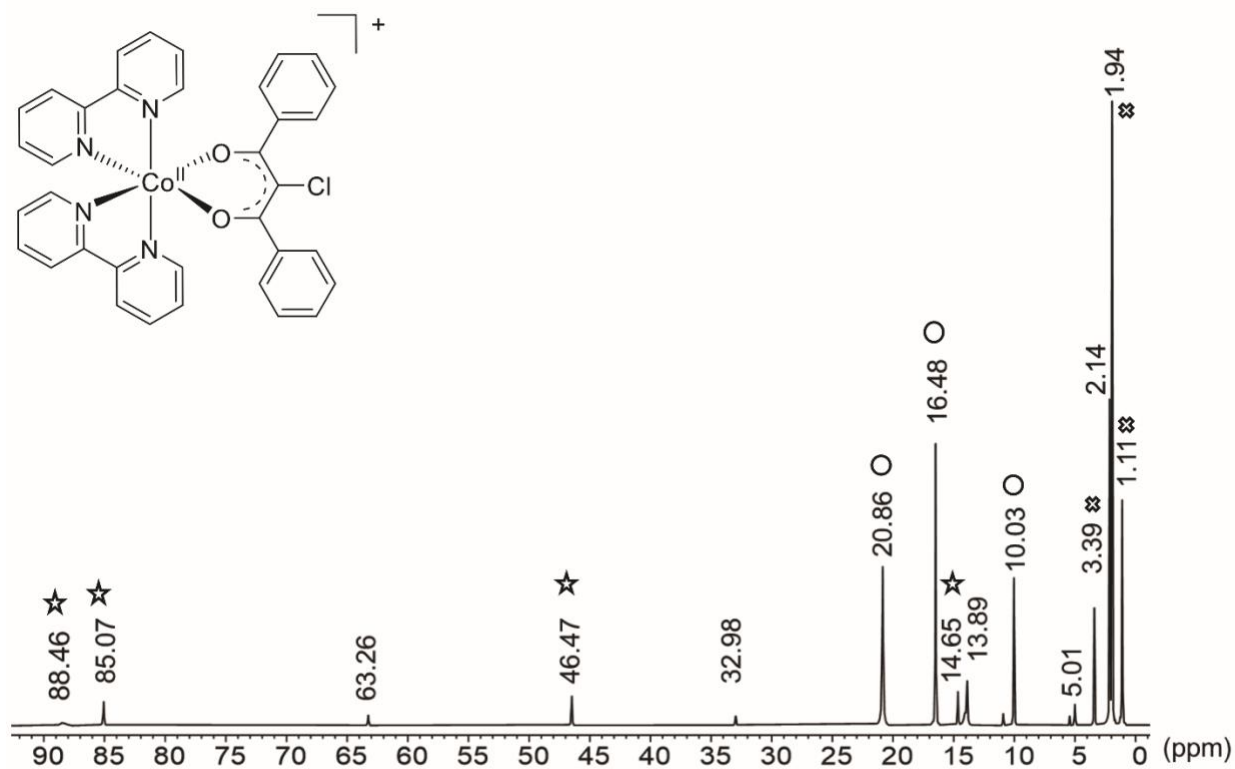

**Fig S7.** <sup>1</sup>H NMR of **8** in CD<sub>3</sub>CN. The signals marked with an open circle correspond to the coordinated diketonate ligand in **8**. Signals marked with a star indicate those from [(bpy)<sub>3</sub>Co](ClO<sub>4</sub>)<sub>2</sub> (**11**). Residual solvent signals are indicated with (X).

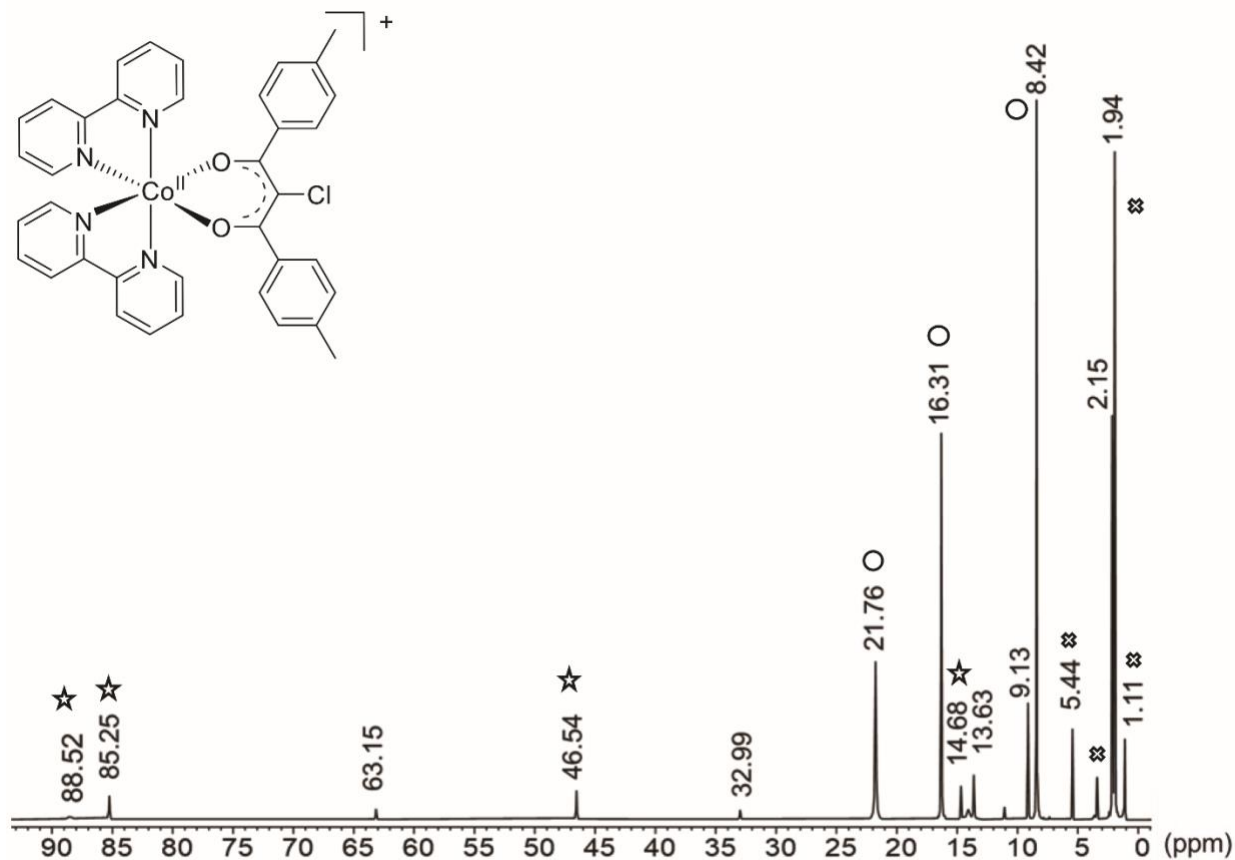

**Fig S8.** <sup>1</sup>H NMR of **9** in CD<sub>3</sub>CN. The signals marked with an open circle correspond to the coordinated diketonate ligand in **9**. Signals marked with a star indicate those from [(bpy)<sub>3</sub>Co](ClO<sub>4</sub>)<sub>2</sub> (**11**). Residual solvent signals are indicated with (X).

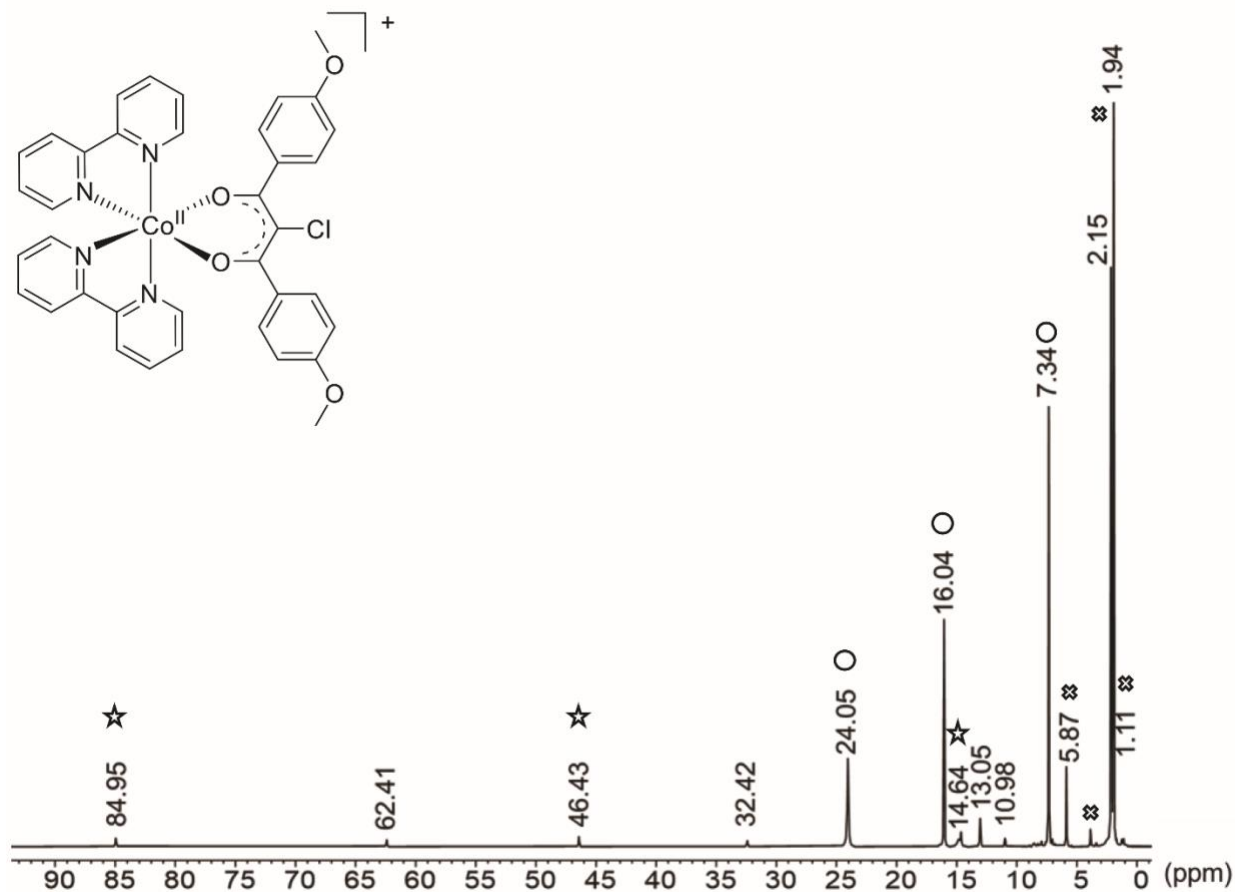

**Fig S9.**  $^1\text{H}$  NMR of **10** in  $\text{CD}_3\text{CN}$ . The signals marked with an open circle correspond to the coordinated diketonate ligand in **10**. Signals marked with a star indicate those from  $[(\text{bpy})_3\text{Co}](\text{ClO}_4)_2$  (**11**). Residual solvent signals are indicated with (X).

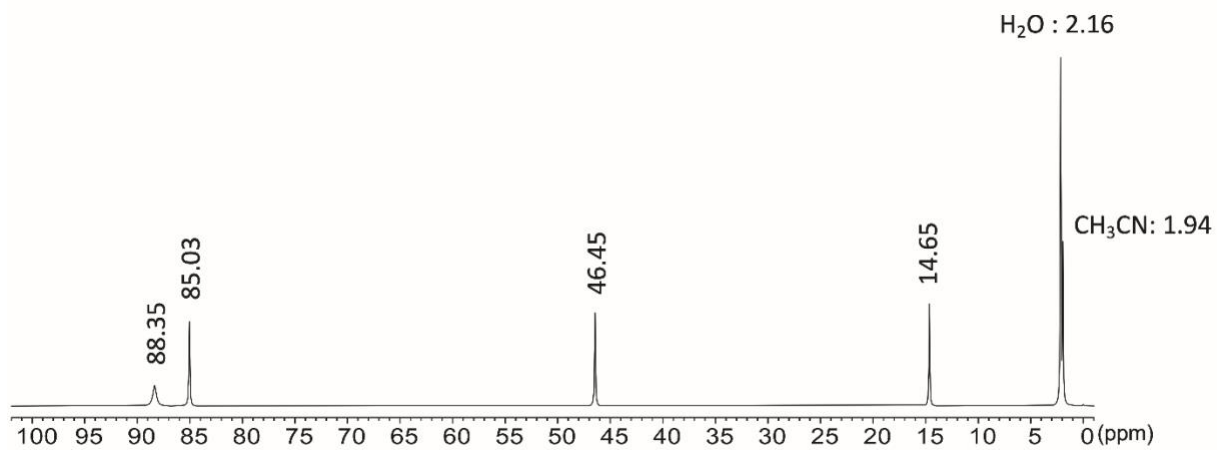

**Fig S10.**  $^1\text{H}$  NMR of  $[(\text{bpy})_3\text{Co}](\text{ClO}_4)_2$  (**11**) in  $\text{CD}_3\text{CN}$ .

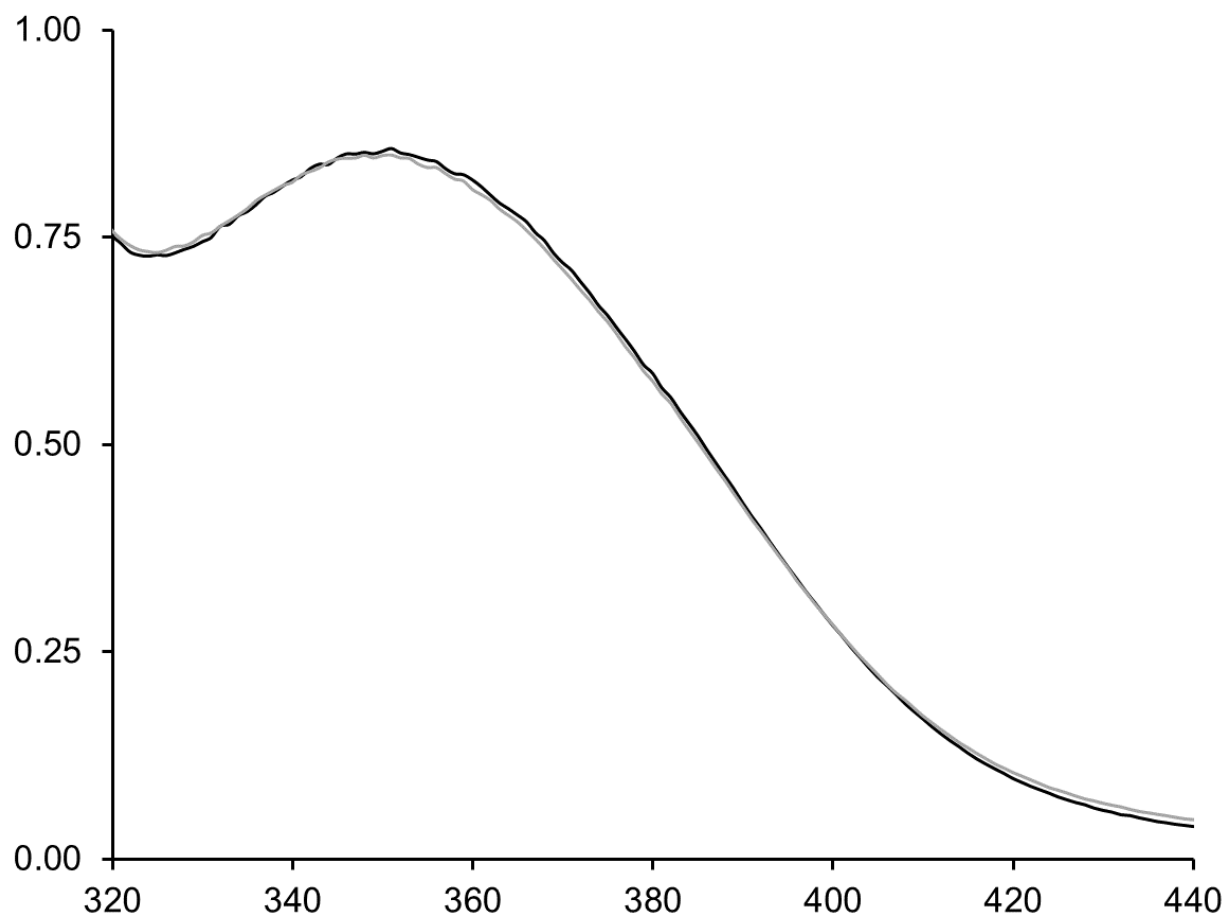

**Fig S11.** UV-Vis spectrum of **8** (black) in CH<sub>3</sub>CN. The spectrum in gray is for the same solution after exposure to air in the dark for 20 hours.

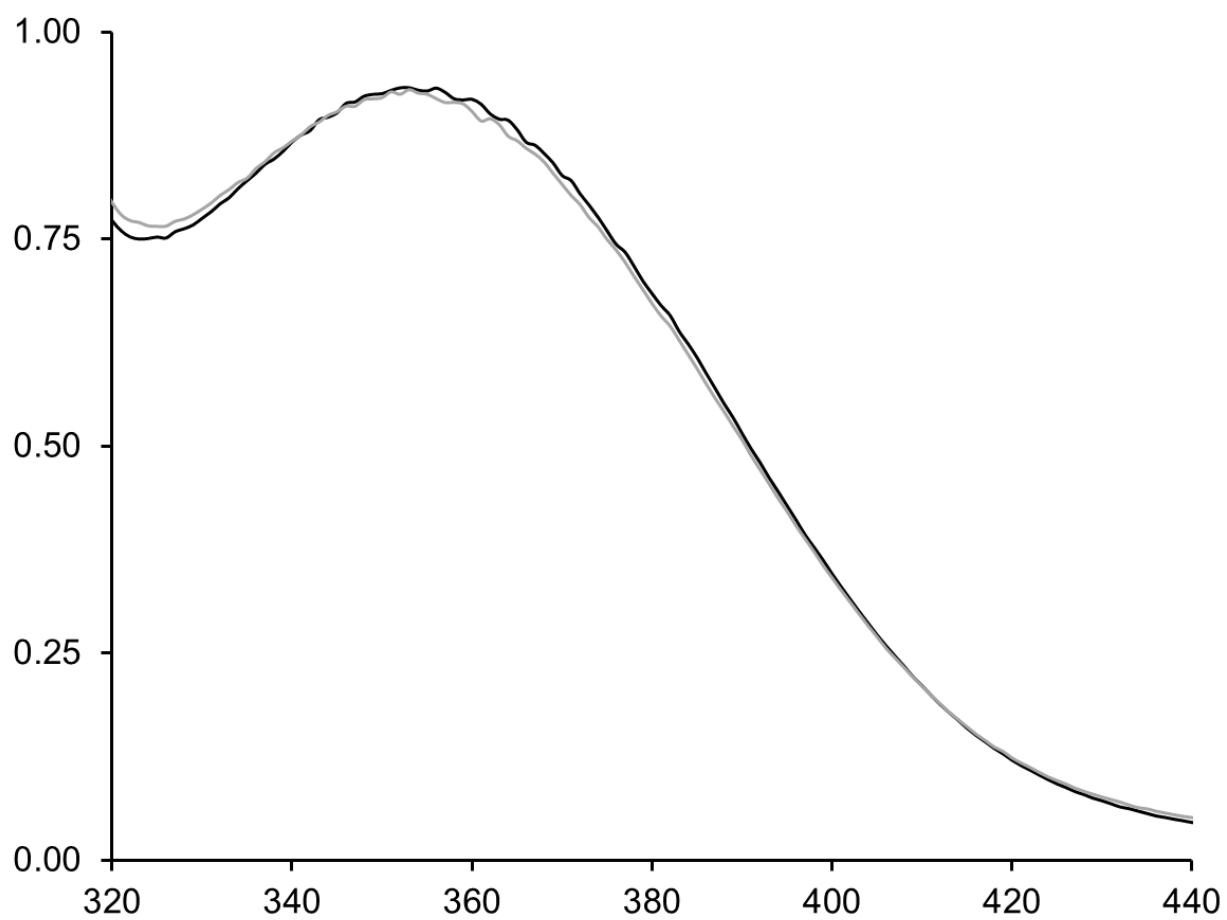

**Fig S12.** UV-Vis spectrum of **9** (black) in CH<sub>3</sub>CN. The spectrum in gray is for the same solution after exposure to air in the dark for 20 hours.



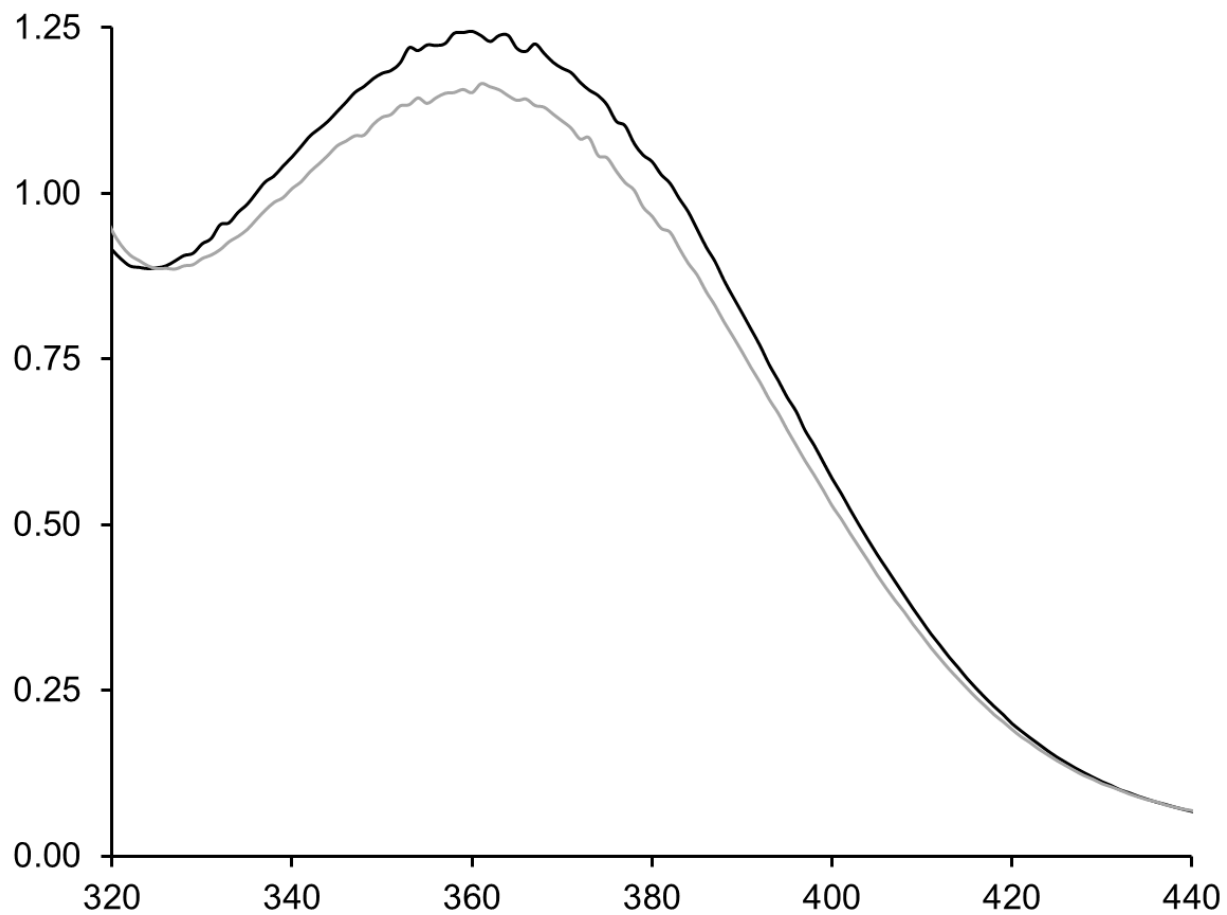

**Fig S13.** Absorption spectrum of **10** (black) in CH<sub>3</sub>CN. The spectrum in gray is for the same solution after exposure to air in the dark for 20 hours.

a) Organic Recovery

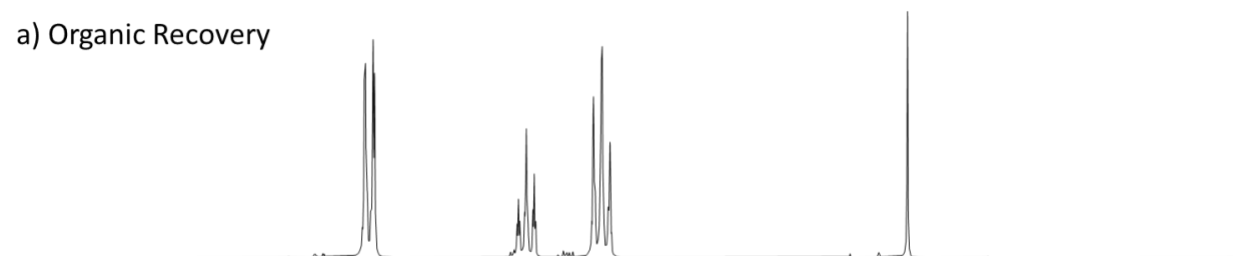

b)

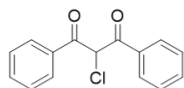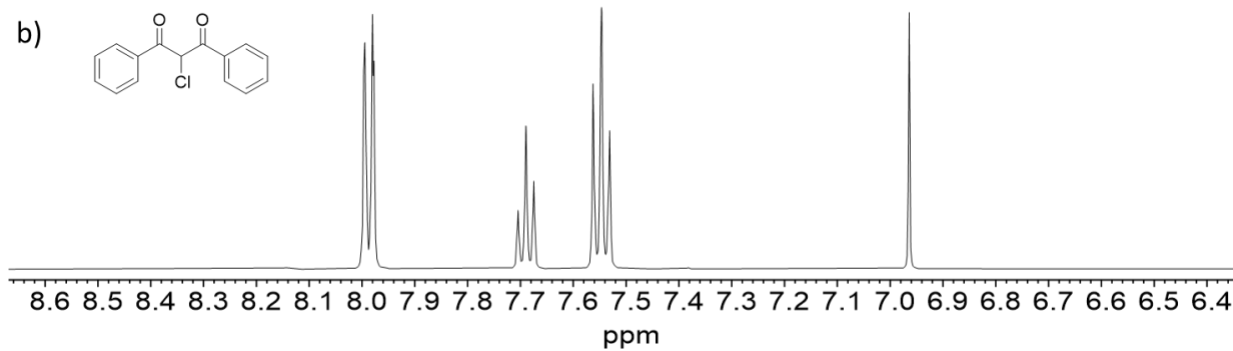

**Fig S14.** <sup>1</sup>H NMR spectra in CD<sub>3</sub>CN from: a) The isolated organic products from illumination of **8** at 350 nm for 20 hours under N<sub>2</sub>. b) 2-chloro-1,3-diphenyl-1,3-propanedione.

a) Organic Recovery

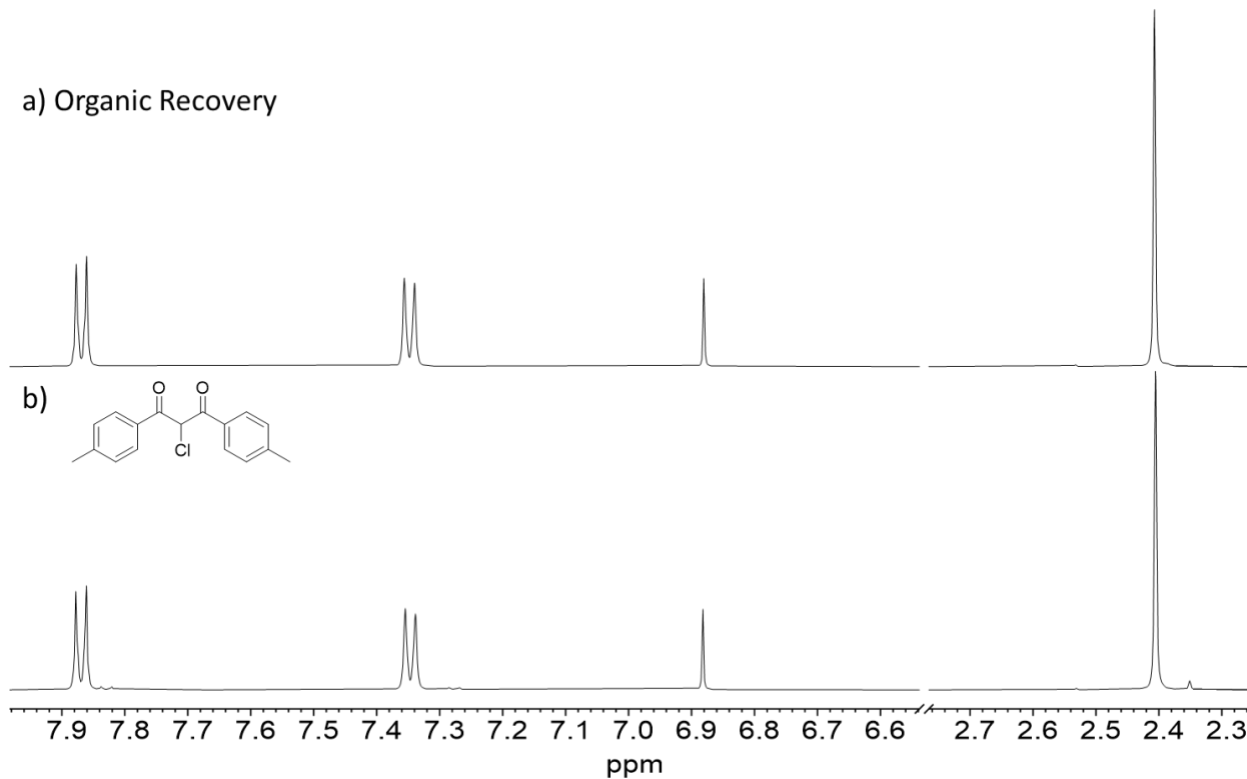

**Fig S15.** <sup>1</sup>H NMR spectra in CD<sub>3</sub>CN from: a) The isolated organic products from illumination of **9** at 350 nm for 20 hours under N<sub>2</sub>. b) 2-chloro-1,3-bis(4-methylphenyl)-1,3-propanedione.

a) Organic Recovery

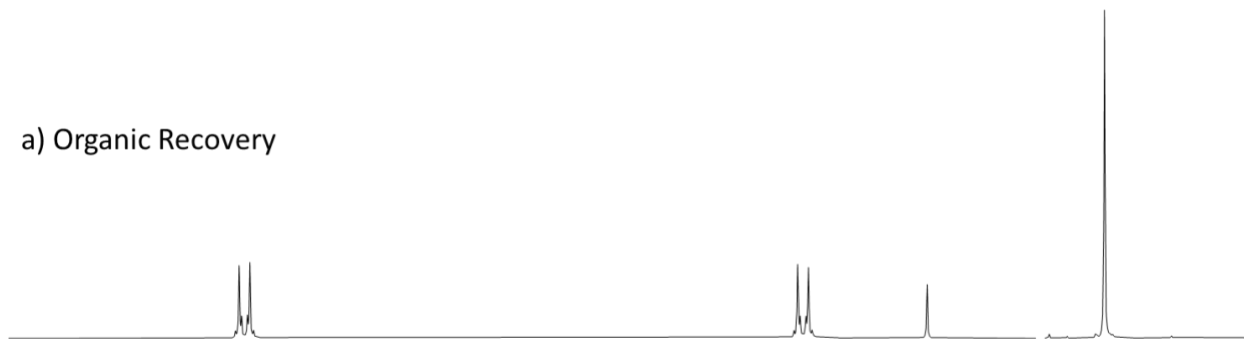

b)

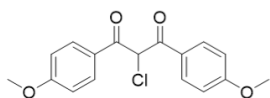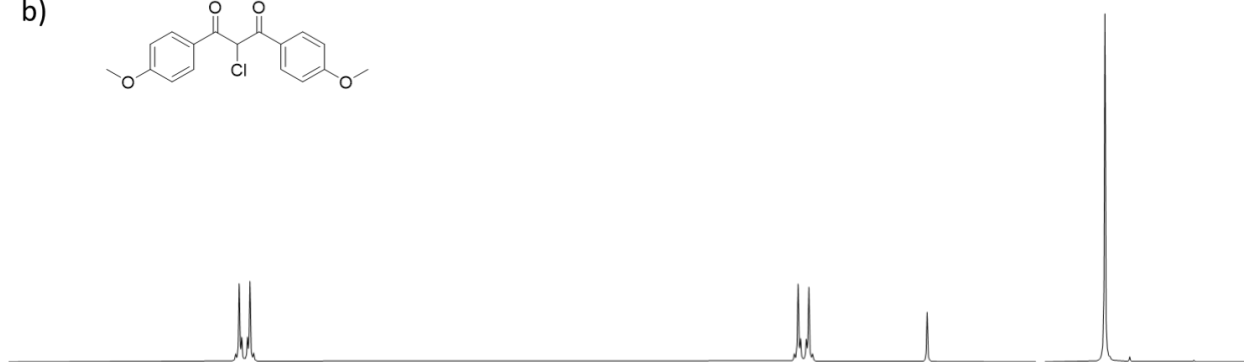

8.3 8.2 8.1 8.0 7.9 7.8 7.7 7.6 7.5 7.4 7.3 7.2 7.1 7.0 6.9 6.8 6.7 3.9 3.8 3.7  
ppm

**Fig S16.**  $^1\text{H}$  NMR spectra in  $\text{CD}_3\text{CN}$  from: a) The isolated organic products from illumination of **10** at 350 nm for 20 hours under  $\text{N}_2$ . b) 2-chloro-1,3-bis(4-methoxyphenyl)-1,3-propanedione.

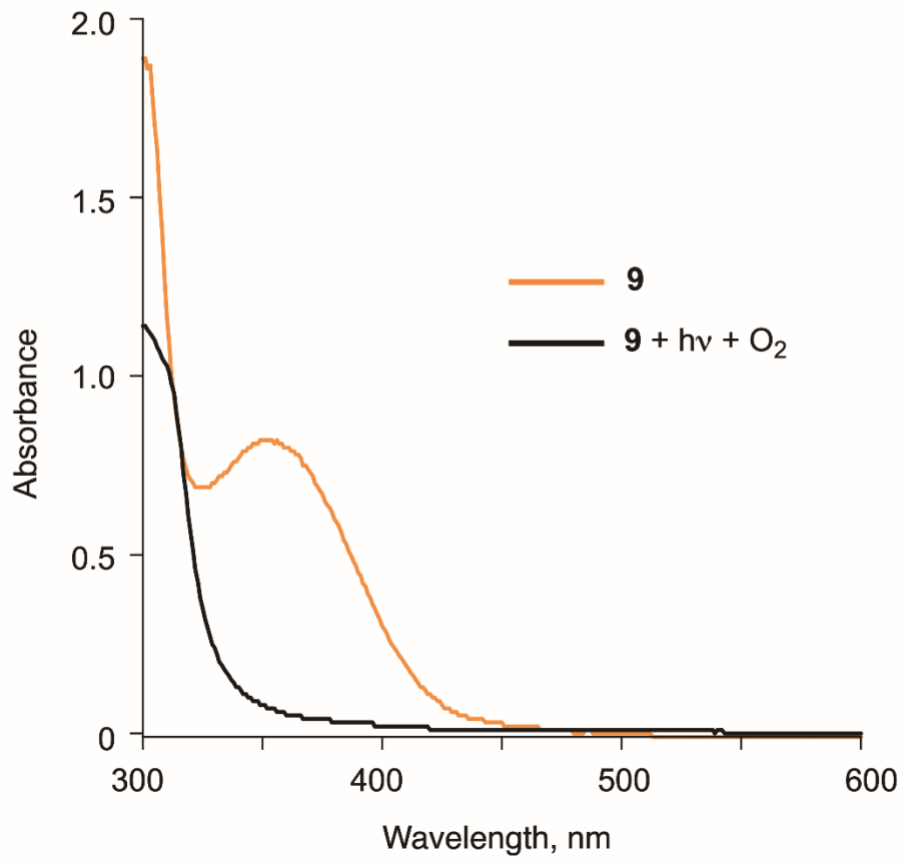

**Fig S17.** Absorption spectral changes upon illumination of **9** in  $O_2$ -purged  $CH_3CN$  at 350 nm.

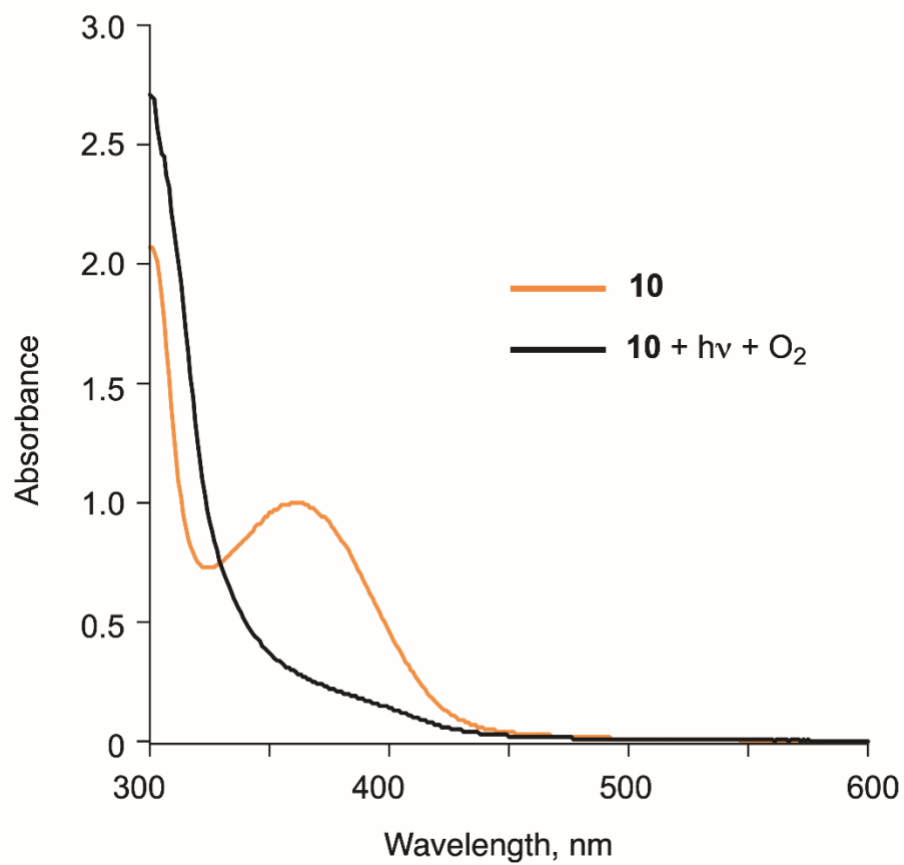

**Fig S18.** Absorption spectral changes upon illumination of **10** in  $O_2$ -purged  $CH_3CN$  at 350 nm.

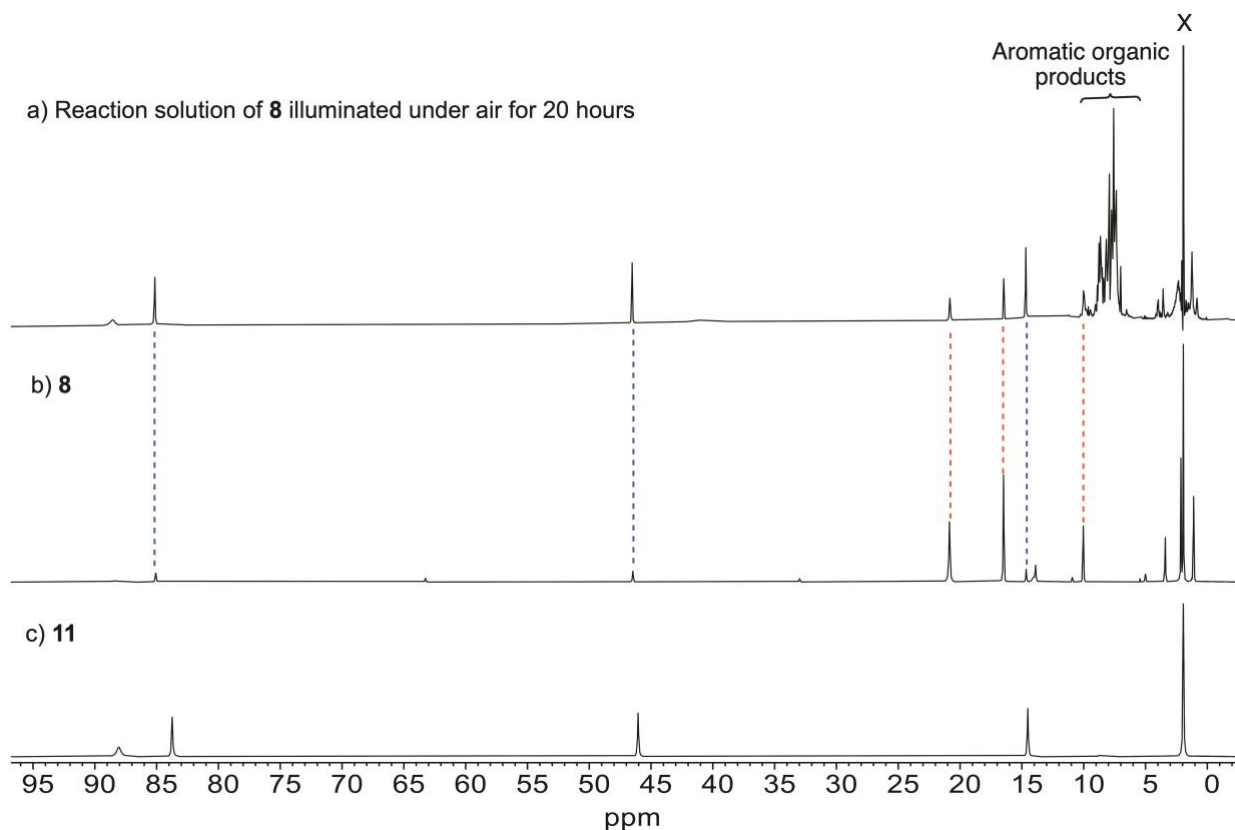

**Fig S19.**  $^1\text{H}$  NMR studies of the UV-light induced  $\text{O}_2$  reactivity of **8** in  $\text{CD}_3\text{CN}$  (residual solvent signal designated by X). a) Product mixture for an  $\text{O}_2$ -purged  $\text{CH}_3\text{CN}$  solution of **8** after illumination with 350 nm lamps for 20 hours; b)  $^1\text{H}$  NMR spectrum of **8**. The change in the relative intensity of the signals for **8** and  $[(\text{bpy})_3\text{Co}](\text{ClO}_4)_2$  (**11**), designated by red and blue dashed lines, respectively, and the appearance of signals for free aromatic organic products, provide evidence for the light-driven diketonate reactivity. c)  $^1\text{H}$  NMR of  $[(\text{bpy})_3\text{Co}](\text{ClO}_4)_2$  (**11**) in  $\text{CD}_3\text{CN}$ . The slight shift in the signals of this compound at  $\sim 46$  and  $\sim 84$  ppm in the sample containing **8** (spectrum b)) is attributed to the presence paramagnetic character of the compounds.

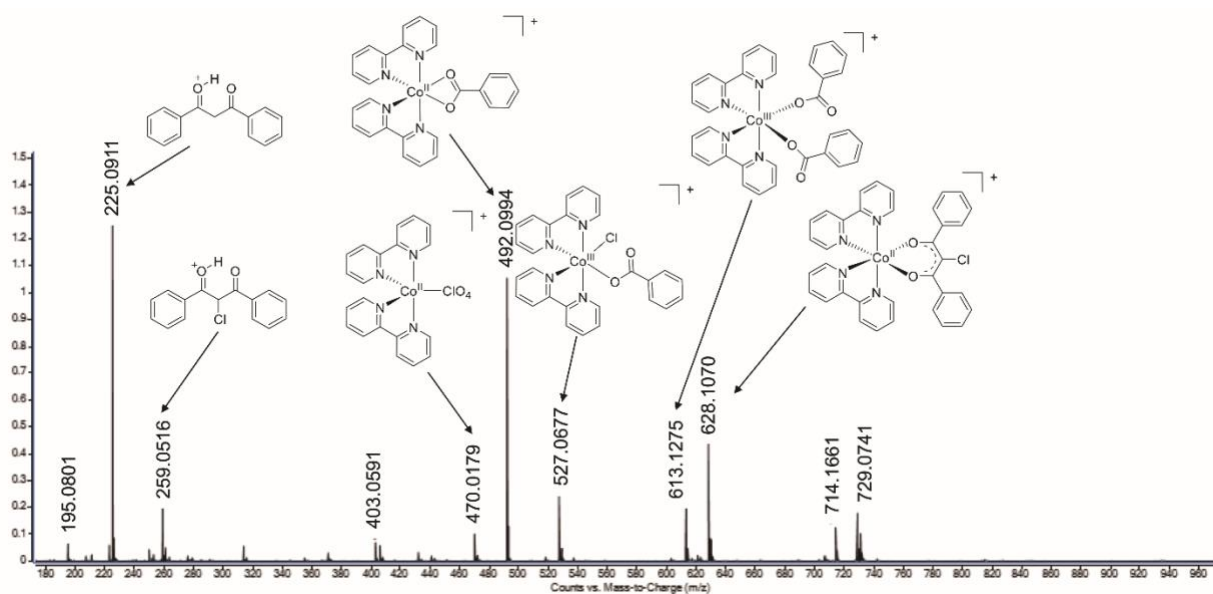

**Fig S20.** ESI-MS of an O<sub>2</sub>-purged CH<sub>3</sub>CN solution of **8** after illumination at 350 nm for 20 hours.



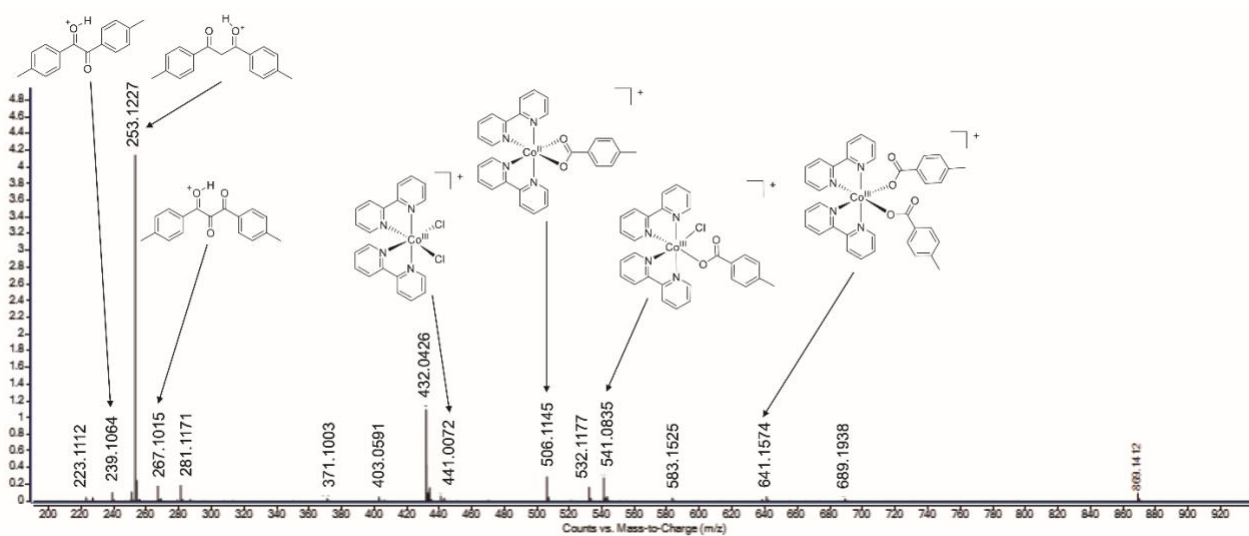

**Fig S21.** ESI-MS of an O<sub>2</sub>-purged CH<sub>3</sub>CN solution of **9** after illumination at 350 nm for 20 hours.

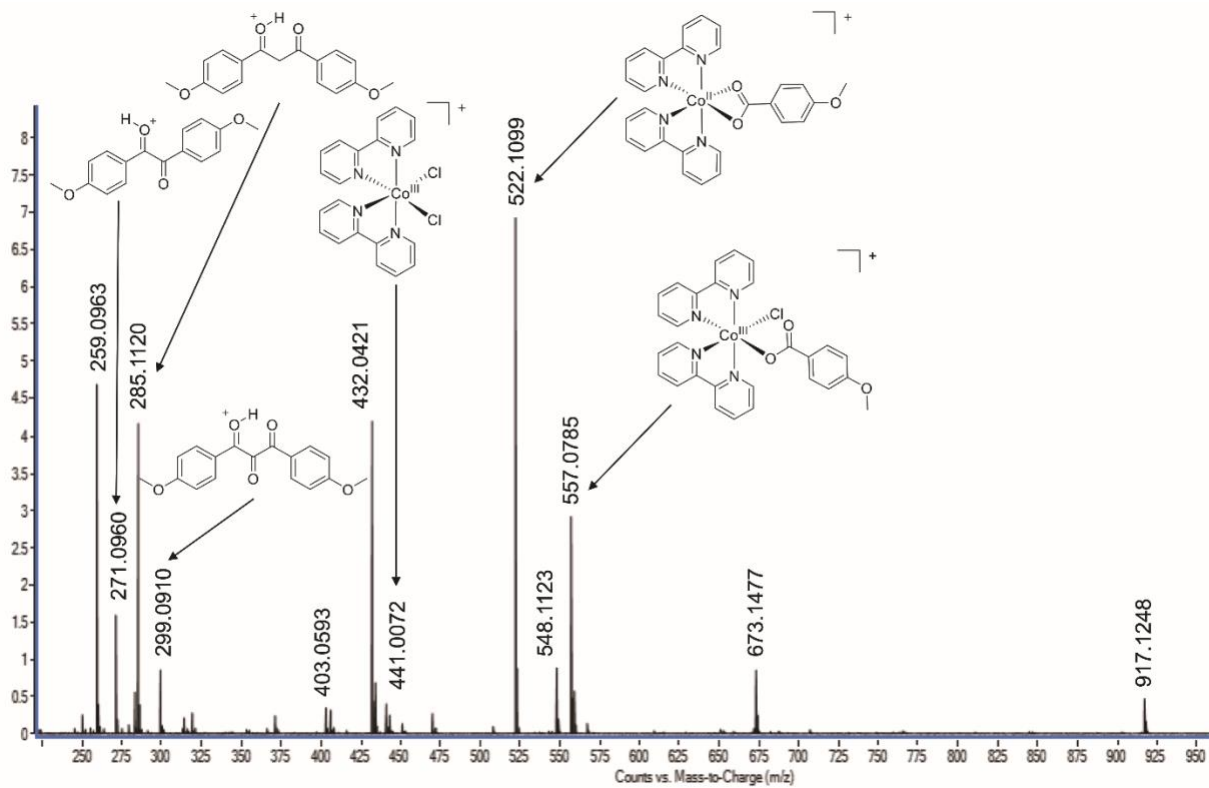

**Fig S22.** ESI-MS of an O<sub>2</sub>-purged CH<sub>3</sub>CN solution of **10** after illumination at 350 nm for 20 hours.

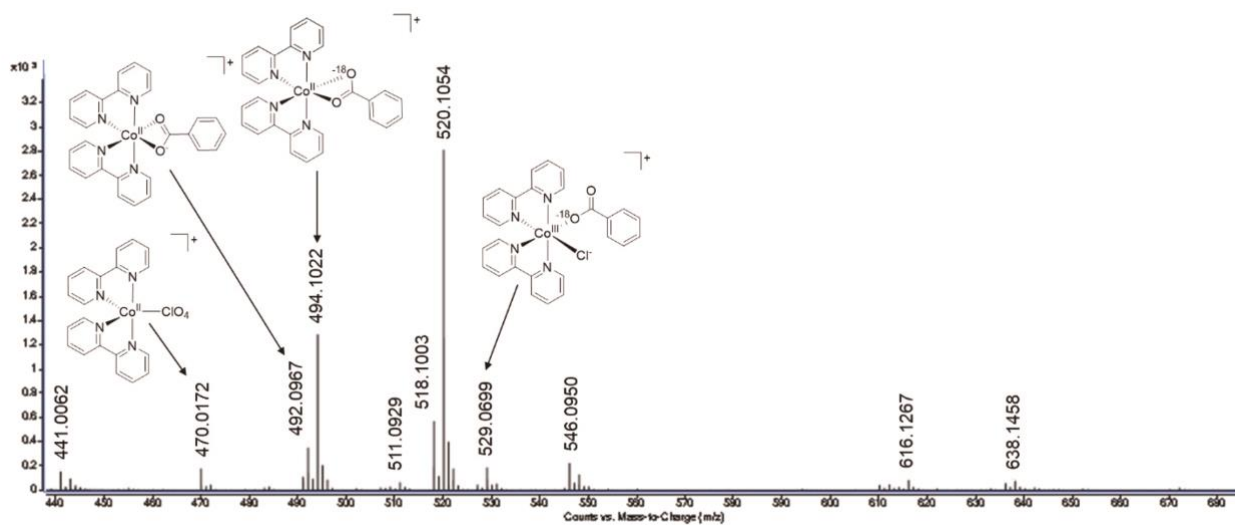

**Fig S23.** ESI-MS of an  $\text{CH}_3\text{CN}$  solution of **8** illuminated at 350 nm under  $^{18}\text{O}_2$  for 20 hours.  $^{18}\text{O}$  incorporation is indicated by comparison of the isotope patterns for  $[(\text{bpy})_2\text{Co}(^{18}\text{OOCPh})]^+$  ( $m/z$  494.1022) and  $[(\text{bpy})_2\text{Co}(\text{O}_2\text{CPh})]^+$  ( $m/z$  492.0967).

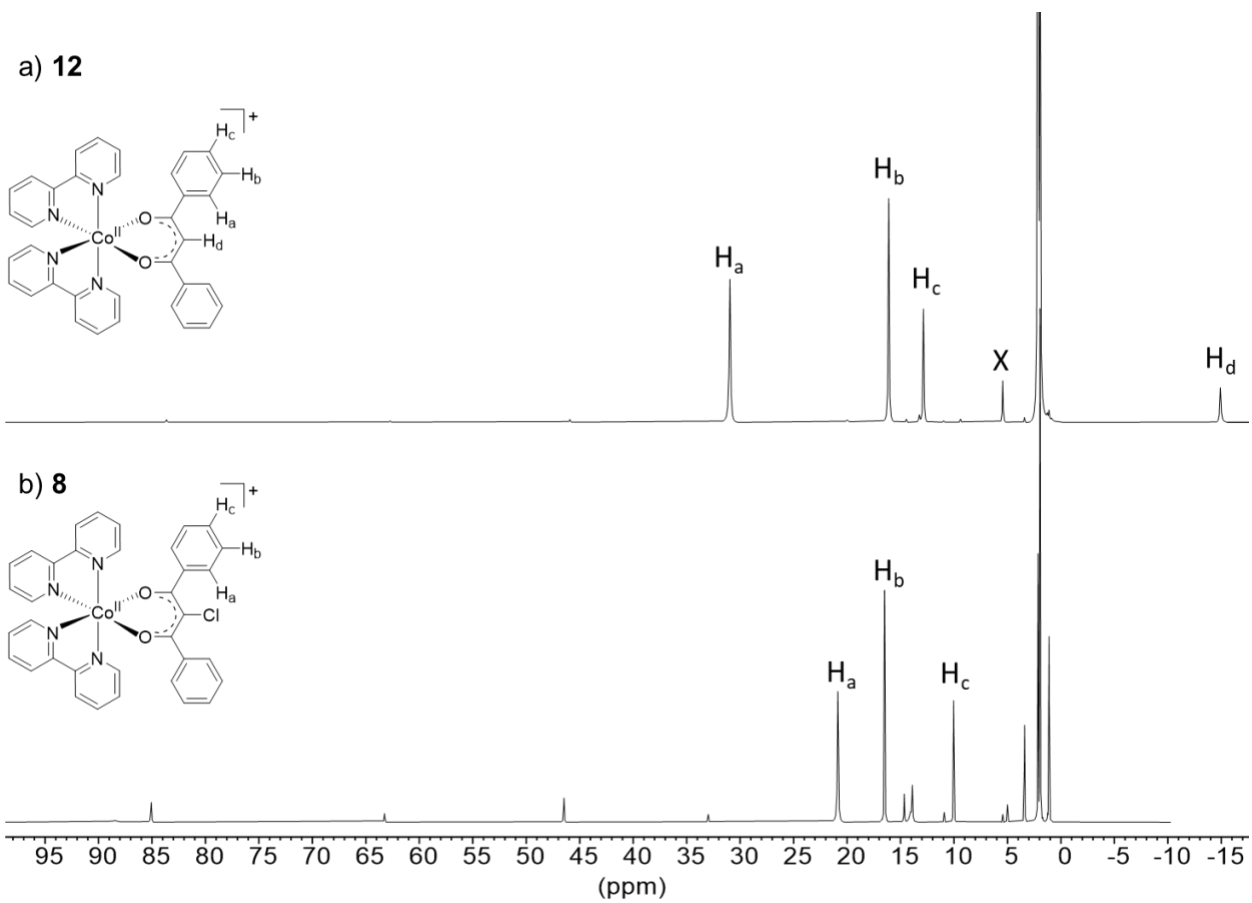

**Fig S24.** a)  $^1\text{H}$  NMR of **12** in  $\text{CD}_3\text{CN}$ . A residual solvent signal ( $\text{CH}_2\text{Cl}_2$ ) is indicated with (X) in the spectrum of **12**; b)  $^1\text{H}$  NMR of **8** in  $\text{CD}_3\text{CN}$ .

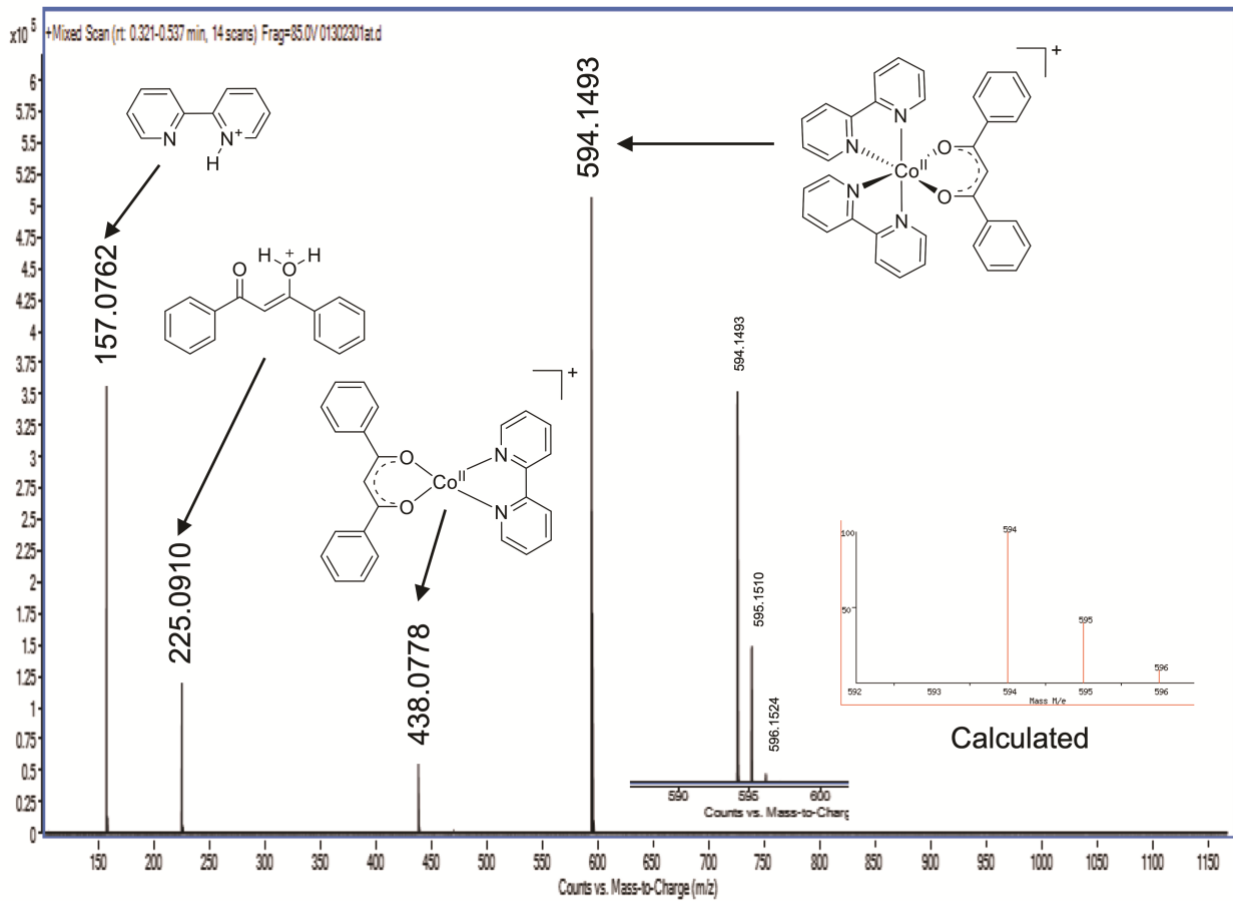

Fig S25. ESI-MS of **12** in  $\text{CH}_3\text{CN}$ .

a) **12** + hv

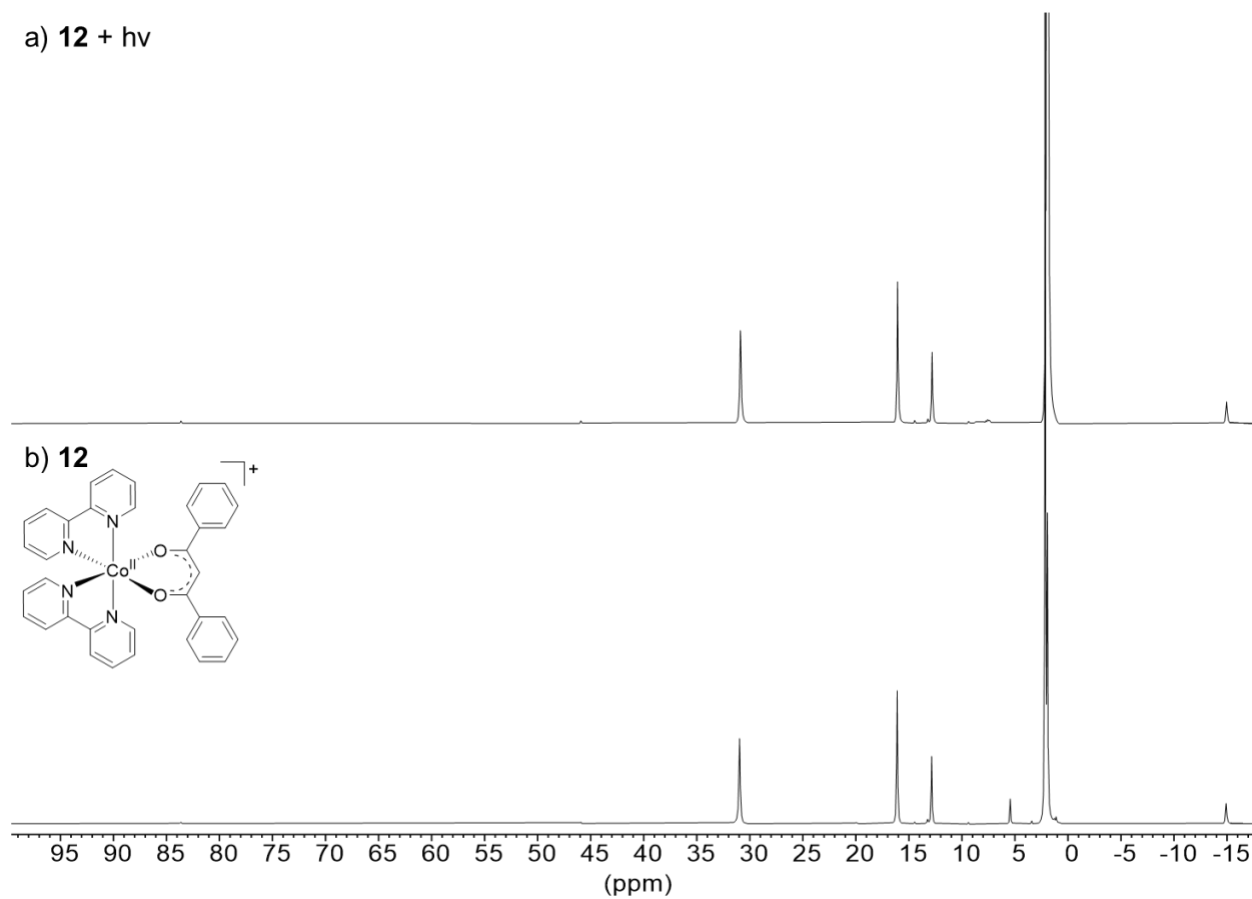

**Fig S26.** a) <sup>1</sup>H NMR of **12** after illumination at 350 nm in CD<sub>3</sub>CN. b) **12** before illumination.

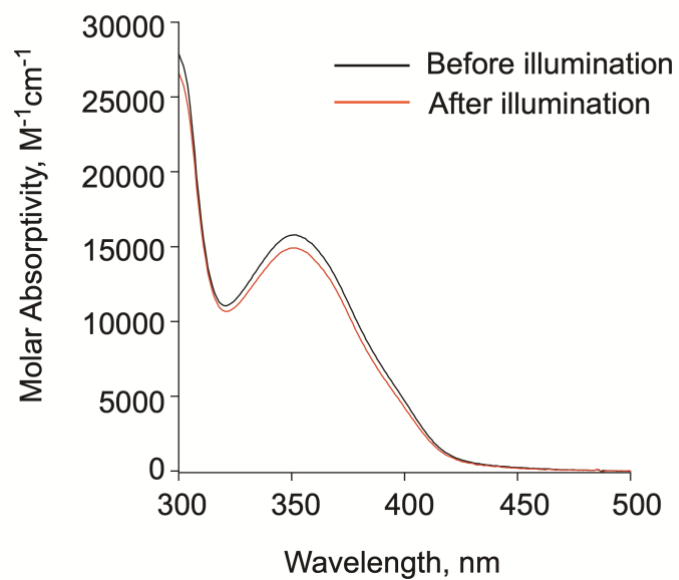

**Fig S27.** Absorption spectral features of **12** in acetonitrile before and after illumination of an O<sub>2</sub> purged solution at 350 nm.

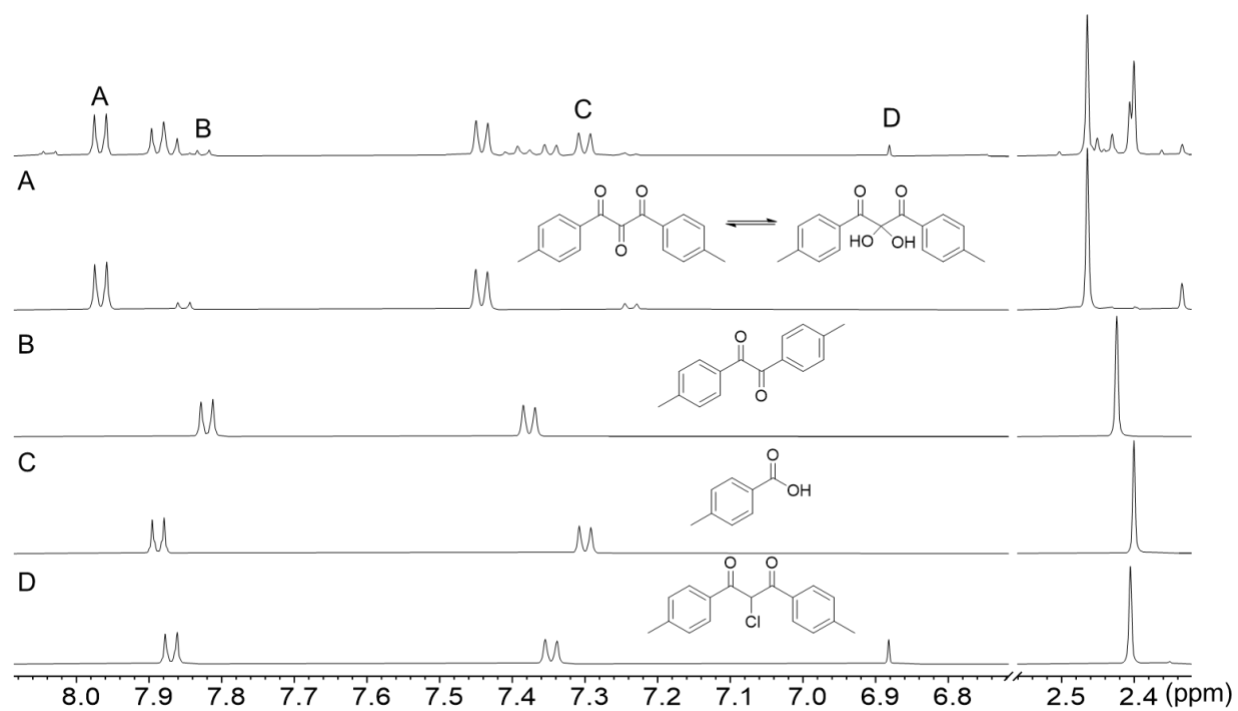

**Fig S28.** <sup>1</sup>H NMR of isolated organic products from the illumination of **9** in O<sub>2</sub>-purged CH<sub>3</sub>CN with 350 nm for 20 hours (top) compared to the <sup>1</sup>H NMR of organic products (A-D). Resonances that can be used to identify a specific product are marked with A-D. Spectra collected in CD<sub>3</sub>CN.



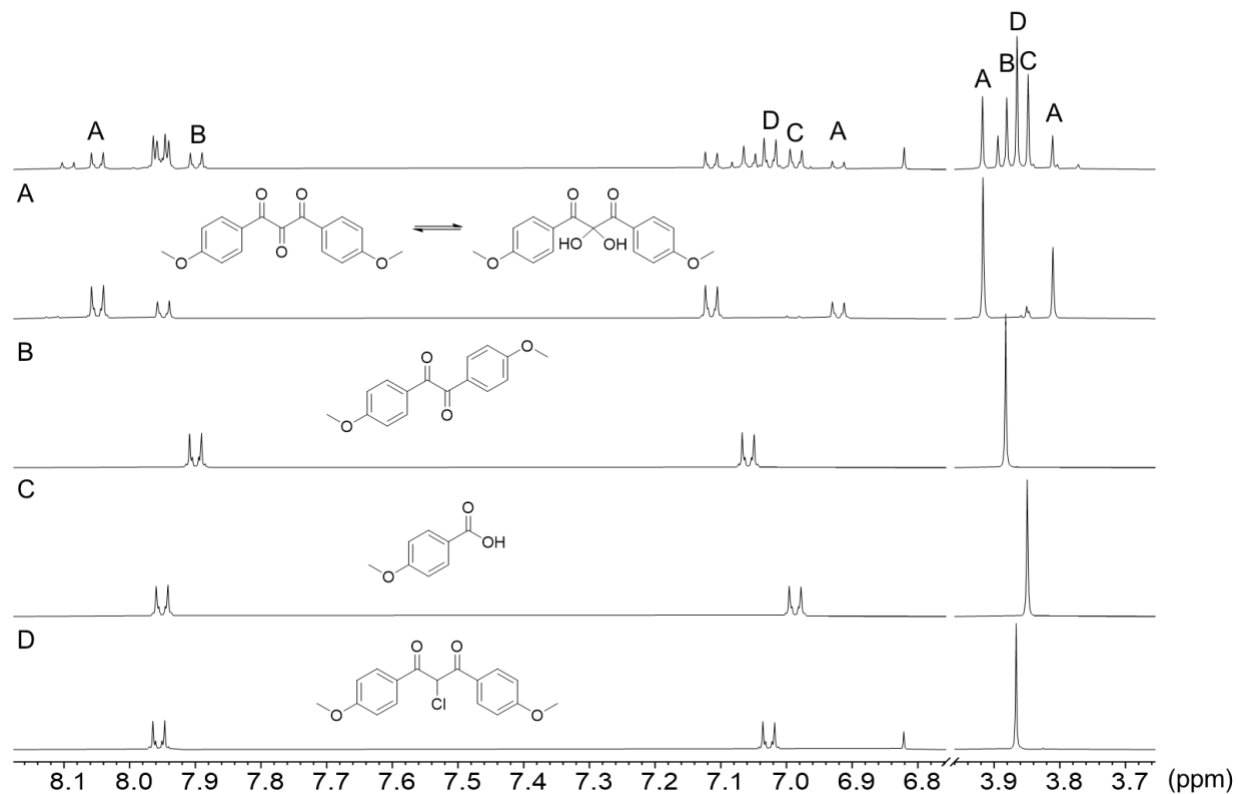

**Fig S29.** <sup>1</sup>H NMR of isolated organic products from the illumination of **10** in O<sub>2</sub>-purged CH<sub>3</sub>CN with 350 nm for 20 hours (top) compared to the <sup>1</sup>H NMR of organic products (A-D). Resonances that can be used to identify a specific product are marked with A-D. Spectra collected in CD<sub>3</sub>CN.

a) Organic Recovery

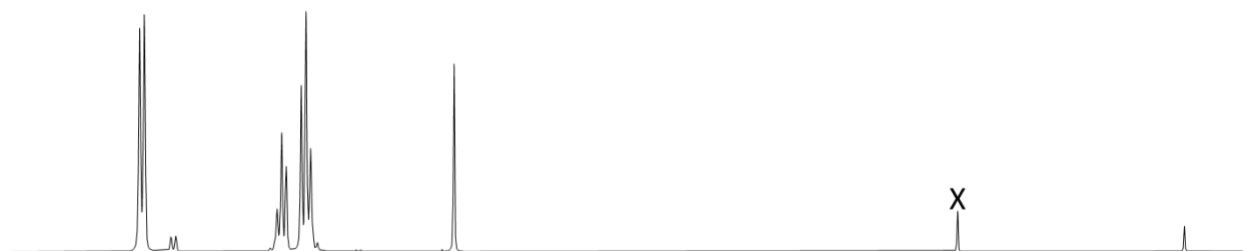

b)

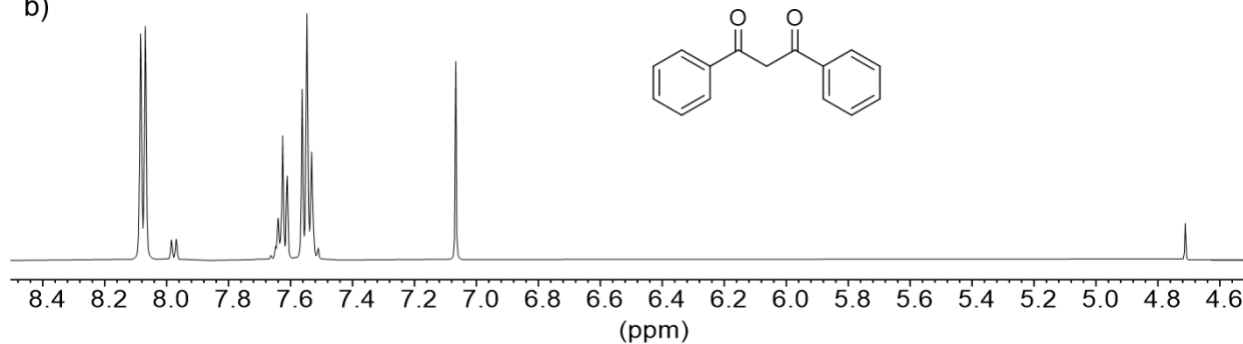

**Fig S30.**  $^1\text{H}$  NMR of a) isolated organic products from the illumination of **12** in  $\text{O}_2$ -purged with 350 nm for 20 hours and b) dibenzoylmethane dissolved in  $\text{CD}_3\text{CN}$ . A residual solvent signal ( $\text{CH}_2\text{Cl}_2$ ) is indicated with (X) in the spectrum of the sample derived from **12**.

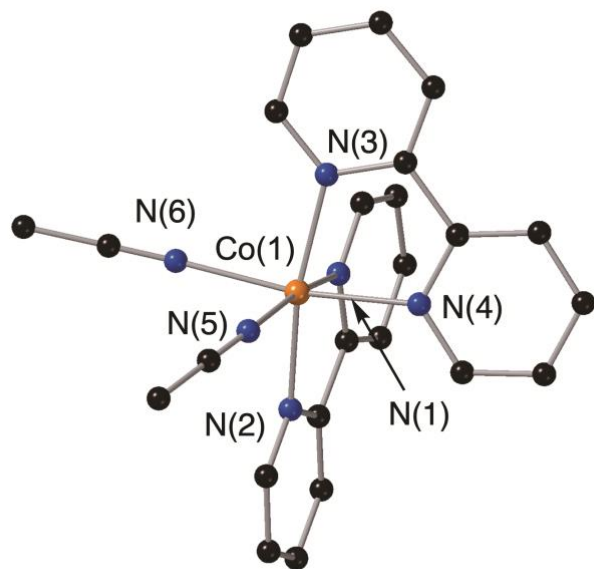

**Fig S31.** Representation of the cationic portion of **13**.

**Table S4.** Selected bond distances (Å) for **13**

|            | <b>13</b>  |
|------------|------------|
| Co(1)-N(1) | 2.1245(14) |
| Co(1)-N(2) | 2.1228(14) |
| Co(1)-N(3) | 2.1198(15) |
| Co(1)-N(4) | 2.1246(14) |
| Co(1)-N(5) | 2.1358(15) |
| Co(1)-N(6) | 2.1356(16) |

**Table S5.** Selected bond angles (deg) for **13**

|                 | <b>13</b> |
|-----------------|-----------|
| N(1)-Co(1)-N(2) | 77.20(5)  |
| N(1)-Co(1)-N(3) | 94.48(5)  |
| N(1)-Co(1)-N(4) | 88.68(5)  |
| N(1)-Co(1)-N(5) | 169.70(6) |
| N(1)-Co(1)-N(6) | 94.04(6)  |
| N(2)-Co(1)-N(3) | 168.65(5) |
| N(2)-Co(1)-N(4) | 94.69(6)  |
| N(2)-Co(1)-N(5) | 92.84(6)  |
| N(2)-Co(1)-N(6) | 95.02(6)  |
| N(3)-Co(1)-N(4) | 77.22(6)  |
| N(3)-Co(1)-N(5) | 95.74(6)  |
| N(3)-Co(1)-N(6) | 93.24(6)  |
| N(4)-Co(1)-N(5) | 94.82(6)  |
| N(4)-Co(1)-N(6) | 170.27(6) |

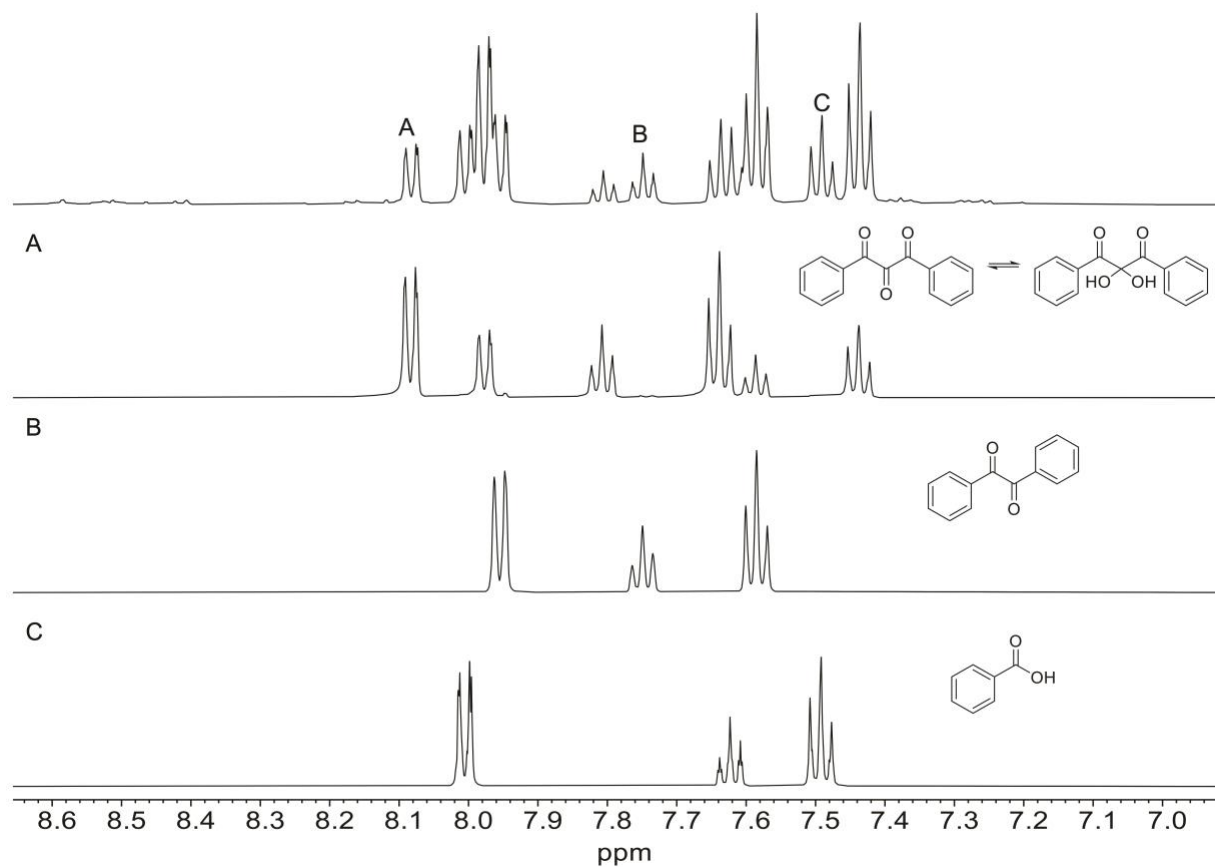

**Fig S32.**  $^1\text{H}$  NMR of isolated organic products from the reaction of **13** with 1,3-diphenylpropanetrione with  $\text{NaOCl}$  in  $\text{CH}_3\text{CN}$ .  $\text{O}_2$  was bubbled into the solution of **13** for two minutes. The isolated products (top) are compared to the  $^1\text{H}$  NMR of organic standards (A-C). Spectra collected in  $\text{CD}_3\text{CN}$ .

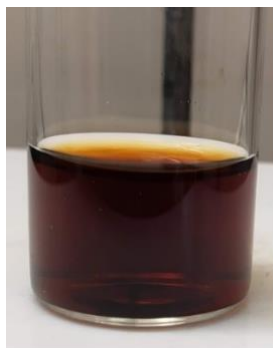

**Fig S33.** Dark red-brown solution generated upon bubbling of O<sub>2</sub> through a CH<sub>3</sub>CN solution of **13** for 8 h.

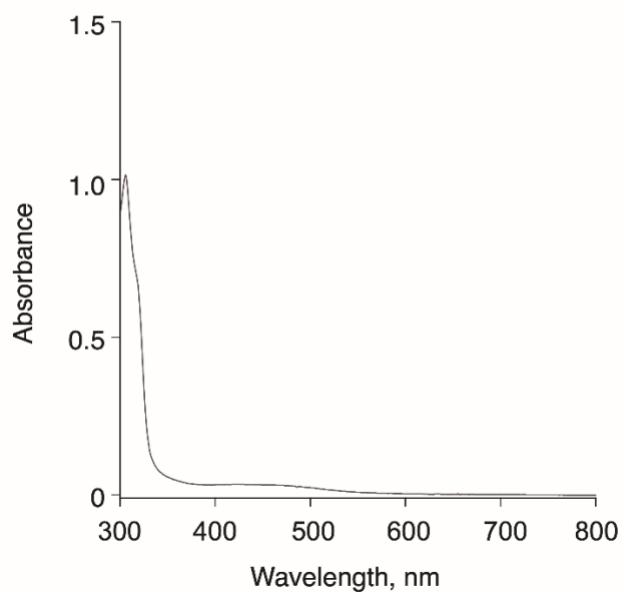

**Fig S34.** Absorption spectrum of **13** ( $2.94 \times 10^{-5}$  M) in CH<sub>3</sub>CN after bubbling with O<sub>2</sub> for 8 h.

a) **13** + O<sub>2</sub>

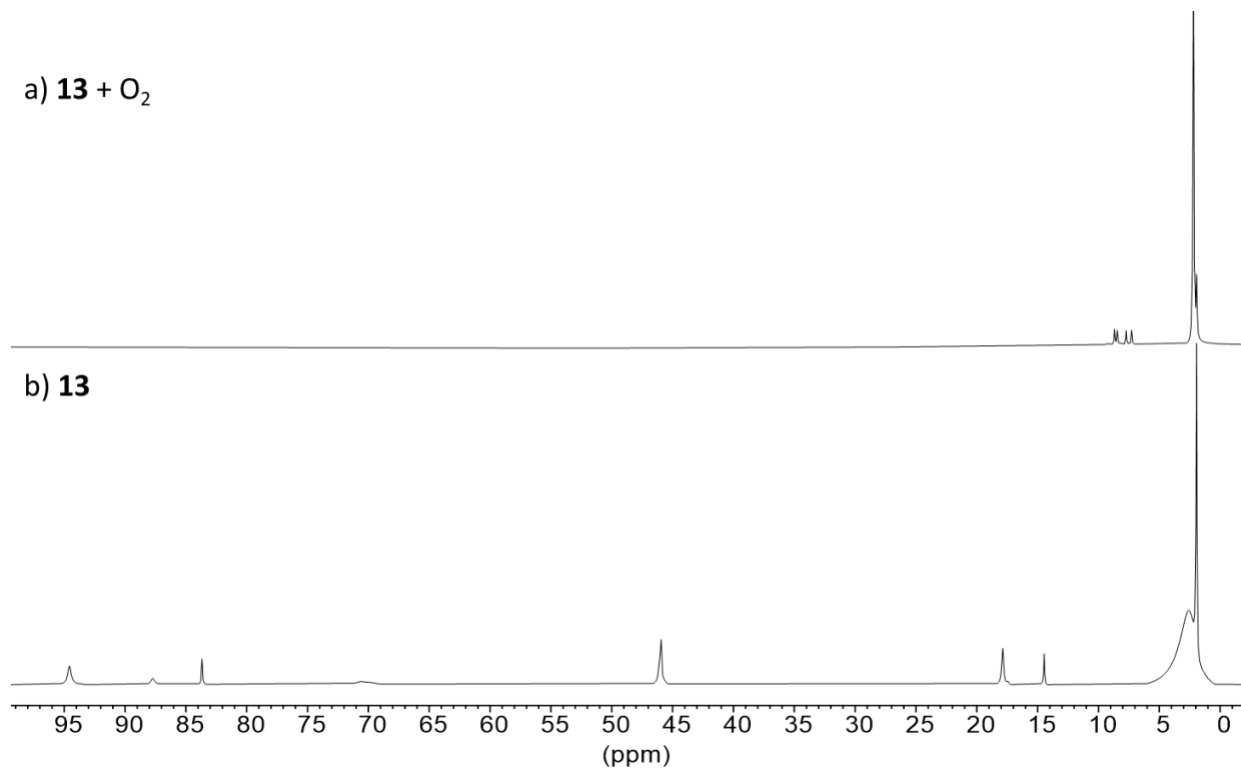

**Fig S35.** <sup>1</sup>H NMR spectra in CD<sub>3</sub>CN of a) **13** + O<sub>2</sub> for 8 h and b) **13**.

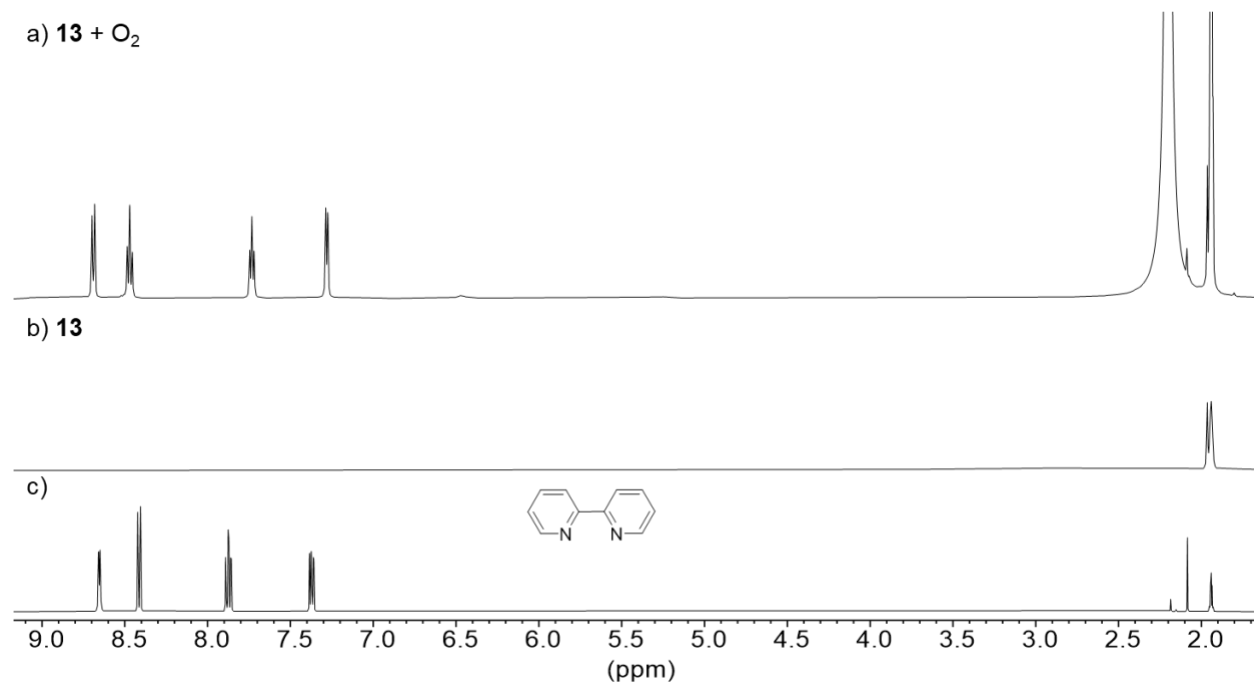

**Fig S36.** <sup>1</sup>H NMR spectra in CD<sub>3</sub>CN of a) **13** + O<sub>2</sub> for 8 h; b) **13** and c) 2,2'-bipyridine.



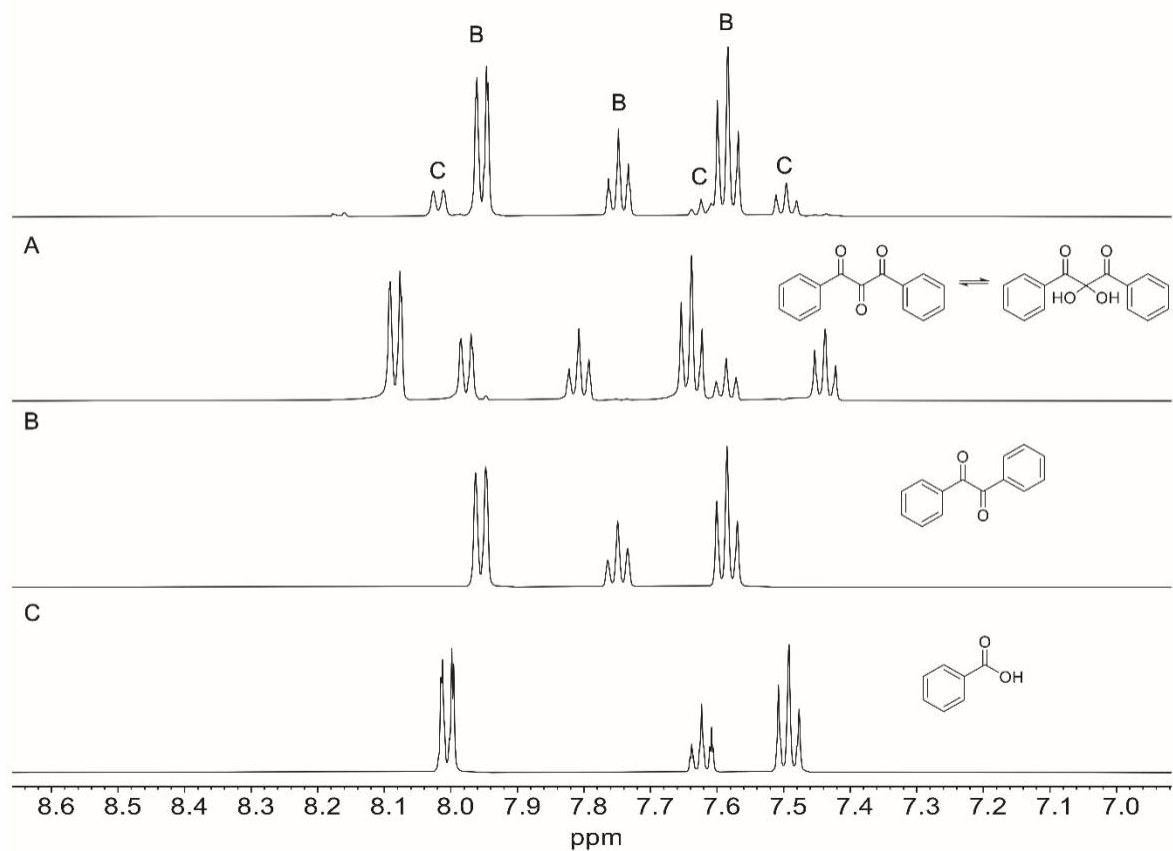

**Fig S37.** <sup>1</sup>H NMR of isolated organic products from the reaction of **13** with 1,3-diphenylpropanetrione with NaOCl in CH<sub>3</sub>CN. O<sub>2</sub> was bubbled into the solution of **13** for 8 h. This resulted in the solution becoming dark red-brown (Fig S33). The trione and NaOCl were then added. The isolated products (top) are compared to the <sup>1</sup>H NMR of pure organic products (A-C). Spectra collected in CD<sub>3</sub>CN

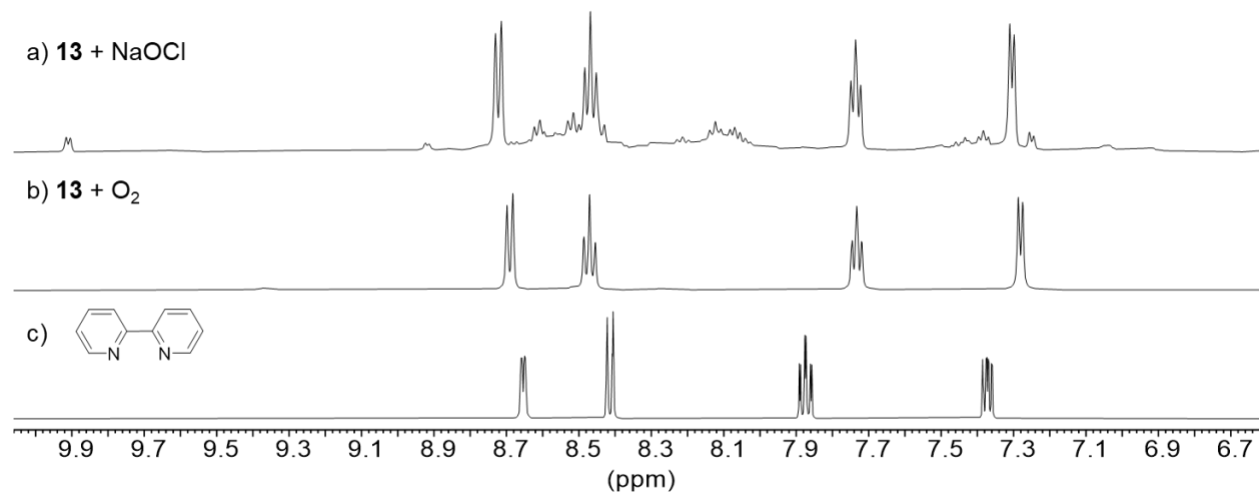

**Fig S38.** <sup>1</sup>H NMR features in the aromatic region of CD<sub>3</sub>CN solutions of **13** upon treatment with stoichiometric NaOCl (a), or upon extended exposure to O<sub>2</sub> (b). Distinct chemical shifts from free bipyridine c) suggest the formation of bpy-ligated Co(III) species.

**13 + NaOCl**

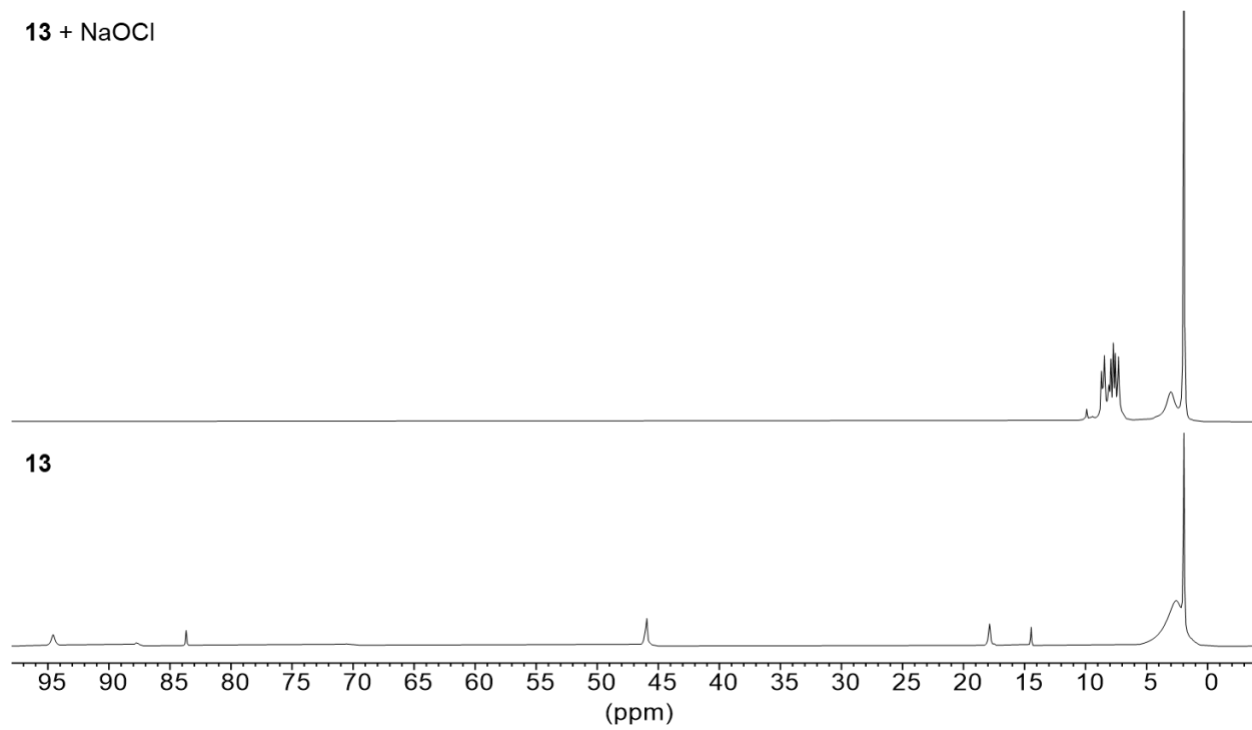

**Fig S39.** <sup>1</sup>H NMR spectra in CD<sub>3</sub>CN of a) **13** + NaOCl and b) **13**.
